# Supplementary material for: Senescence-secreted factors activate Myc and sensitize pretransformed cells to TRAIL-induced apoptosis
Source: PubMed Central journal article supplement (PMC4326894; doi:10.1111/acel.12197), 2014-03-04
Supplement: acel0013-0487-sd4.pdf [file acel0013-0487-sd4.pdf]

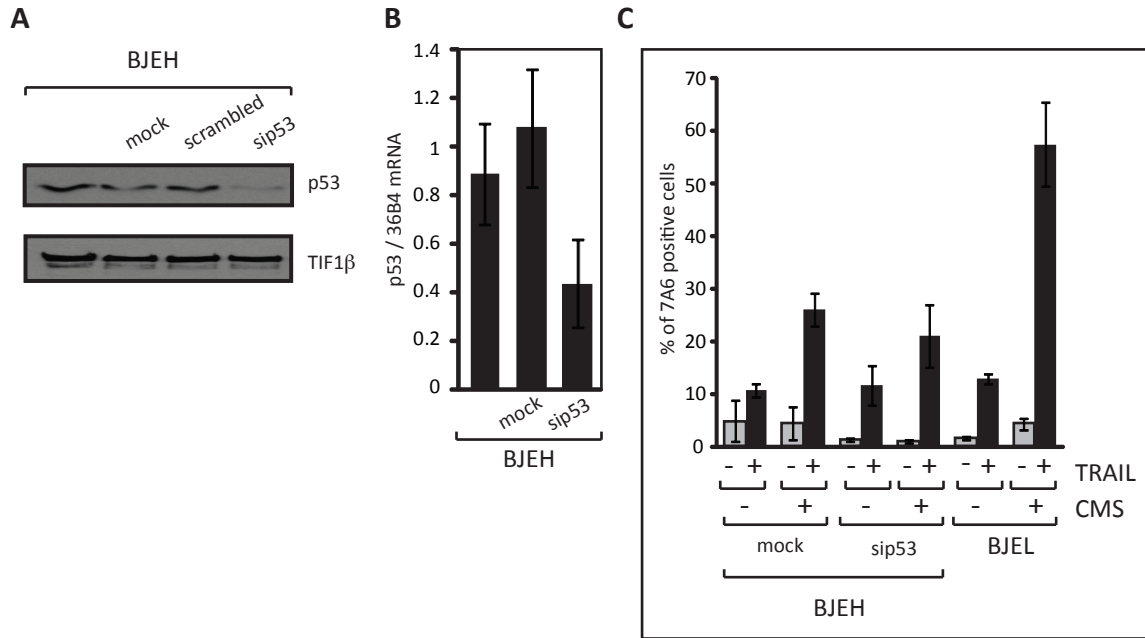

**Figure S4. Knock down of p53 on its own is not sufficient for sensitization of BJEH cells to TRAIL.**

**(A)** Western blot and **(B)** RT-PCR quantitation revealing siRNA-mediated knock down of p53 in BJEH cells. **(C)** CMS exposure of both mock and sip53 transfected BJEH cells generates only a weak TRAIL response (possibly related to transfection-induced stress) but does not lead to the sensitization seen in BJEL cells.
