# Supplementary material for: Senescence-secreted factors activate Myc and sensitize pretransformed cells to TRAIL-induced apoptosis
Source: PubMed Central journal article supplement (PMC4326894; doi:10.1111/acel.12197), 2014-03-04
Supplement: acel0013-0487-sd5.pdf [file acel0013-0487-sd5.pdf]

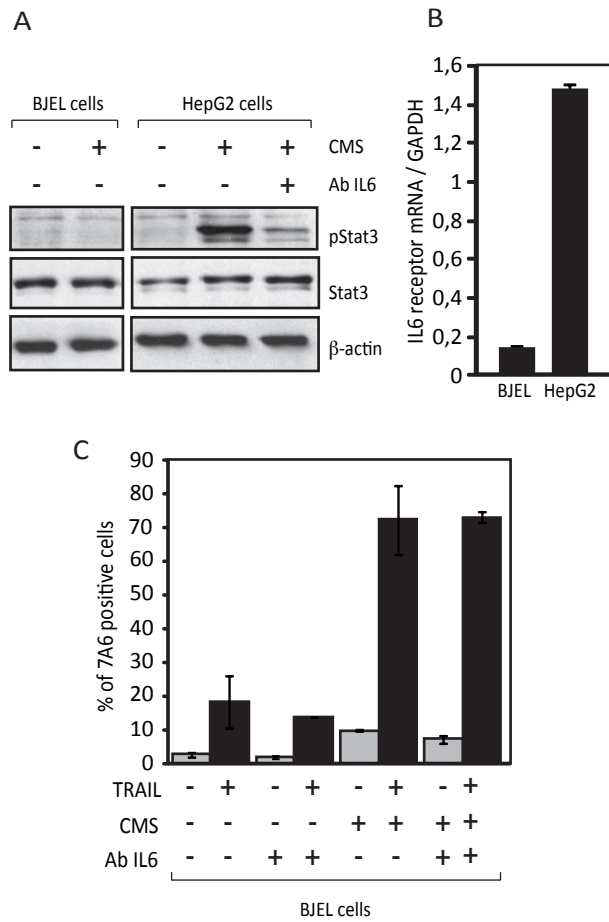

**Figure S5. IL6 is on its own not sufficient for sensitization of BJEL cells to TRAIL.**

**(A)** Serum-starved BJEL and HepG2 cells were stimulated for 15 minutes with CMS. As indicated some HepG2 cells were incubated for 30 min with 10  $\mu$ M IL6-neutralizing antibody. Total protein extracts were collected and immunoblots were done using anti-phospho Stat3 antibody, anti-total Stat3 antibody and  $\beta$ -actin. **(B)** RNA was extracted from BJEL and HepG2 cells and after reverse-transcription PCR was performed using primers specific for *IL6R*. *IL6R* mRNA was normalized to *GAPDH* values. **(C)** Quantification of TRAIL-induced apoptosis in BJEL cells after treatment with 10  $\mu$ M IL6-neutralizing antibody, CMS and/or TRAIL, as indicated.
