# Supplementary material for: Senescence-secreted factors activate Myc and sensitize pretransformed cells to TRAIL-induced apoptosis
Source: PubMed Central journal article supplement (PMC4326894; doi:10.1111/acel.12197), 2014-03-04
Supplement: acel0013-0487-sd6.pdf [file acel0013-0487-sd6.pdf]

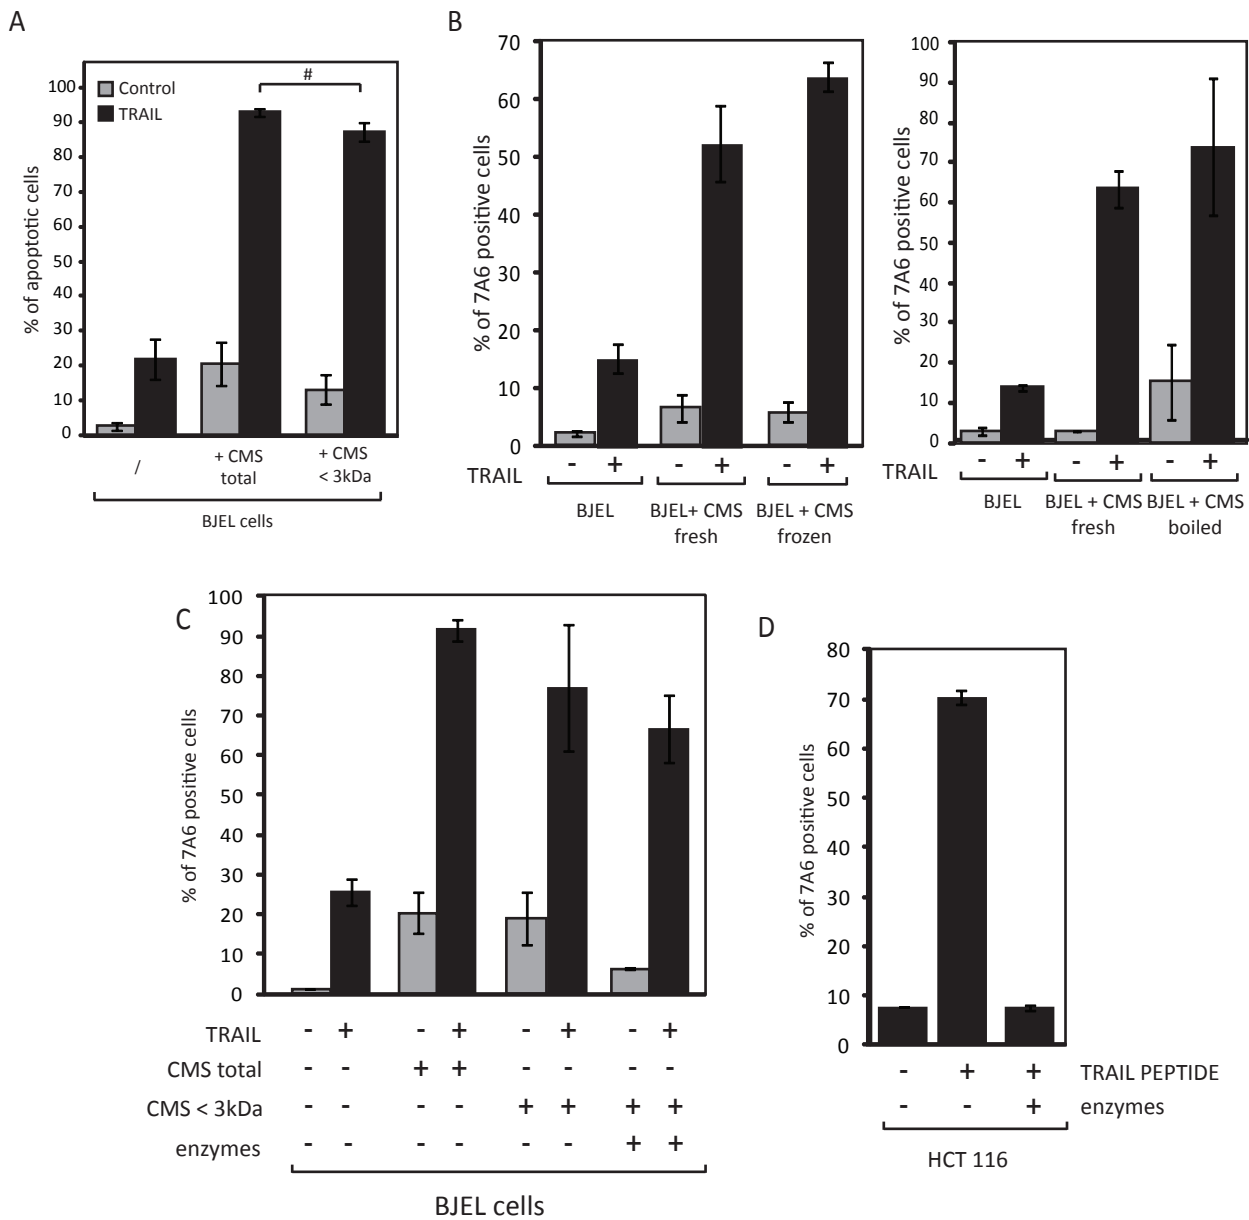

**Figure S6. Properties of TRAIL-sensitizing CMS compound(s).** (A) Both the CMS and the purified < 3 kDa fraction sensitize BJEL cells to comparable levels of TRAIL-induced apoptosis ( $n \geq 4$ , SEM, #  $p > 0.1$ ). (B) CMS factor(s) responsible for sensitization to TRAIL is/are temperature-stable and retain(s) the ability to sensitize BJEL cells to apoptosis after freeze/thawing (left panel) or boiling (right panel). (C and D) CMS factor(s) responsible for sensitization retain(s) the ability to sensitize BJEL cells to TRAIL-induced apoptosis after a proteolytic enzyme treatment (C), while the same treatment led to degradation and loss of activity of a synthetic TRAIL peptide (D) (for the TRAIL peptide mimic see Pavet et al. 2010 Cancer Res 70, 1101).
