# Supplementary material for: Senescence-secreted factors activate Myc and sensitize pretransformed cells to TRAIL-induced apoptosis
Source: PubMed Central journal article supplement (PMC4326894; doi:10.1111/acel.12197), 2014-03-04
Supplement: acel0013-0487-sd8.pdf [file acel0013-0487-sd8.pdf]

| path | Category ID | Category Name                                | # Genes  |          |          |          | p-value  | Corrected p-value | Fold |
|------|-------------|----------------------------------------------|----------|----------|----------|----------|----------|-------------------|------|
|      |             |                                              | Category | Assigned | Expected | Enriched |          |                   |      |
| (i)  | GO:0010941  | regulation of cell death                     | 1180     | 52       | 8,6      | 43,4     | 1,40E-27 | <0.001            | 6    |
| (i)  | GO:0043067  | regulation of programmed cell death          | 1151     | 51       | 8,4      | 42,6     | 4,00E-27 | <0.001            | 6    |
| (i)  | GO:0012501  | programmed cell death                        | 1493     | 56       | 10,9     | 45,1     | 2,10E-26 | <0.001            | 5,1  |
| (i)  | GO:0042981  | regulation of apoptotic process              | 1138     | 50       | 8,3      | 41,7     | 2,30E-26 | <0.001            | 6    |
| (i)  | GO:0008219  | cell death                                   | 1651     | 58       | 12,1     | 45,9     | 5,20E-26 | <0.001            | 4,8  |
| (i)  | GO:0016265  | death                                        | 1653     | 58       | 12,1     | 45,9     | 5,50E-26 | <0.001            | 4,8  |
| (i)  | GO:0006915  | apoptotic process                            | 1479     | 55       | 10,8     | 44,2     | 1,10E-25 | <0.001            | 5,1  |
| (i)  | GO:0048519  | negative regulation of biological process    | 2919     | 72       | 21,4     | 50,6     | 6,50E-24 | <0.001            | 3,4  |
| (i)  | GO:0048523  | negative regulation of cellular process      | 2667     | 69       | 19,5     | 49,5     | 7,20E-24 | <0.001            | 3,5  |
| (i)  | GO:0048518  | positive regulation of biological process    | 3286     | 76       | 24,1     | 51,9     | 7,50E-24 | <0.001            | 3,2  |
| (i)  | GO:0048522  | positive regulation of cellular process      | 2993     | 71       | 21,9     | 49,1     | 1,80E-22 | <0.001            | 3,2  |
| (i)  | GO:0060548  | negative regulation of cell death            | 590      | 35       | 4,3      | 30,7     | 2,50E-22 | <0.001            | 8,1  |
| (i)  | GO:0006950  | response to stress                           | 2762     | 68       | 20,2     | 47,8     | 3,40E-22 | <0.001            | 3,4  |
| (i)  | GO:0043069  | negative regulation of programmed cell death | 571      | 34       | 4,2      | 29,8     | 9,80E-22 | <0.001            | 8,1  |
| (i)  | GO:0008283  | cell proliferation                           | 1475     | 50       | 10,8     | 39,2     | 2,40E-21 | <0.001            | 4,6  |
| (i)  | GO:0042127  | regulation of cell proliferation             | 1131     | 44       | 8,3      | 35,7     | 6,80E-21 | <0.001            | 5,3  |
| (i)  | GO:0043066  | negative regulation of apoptotic process     | 563      | 33       | 4,1      | 28,9     | 7,00E-21 | <0.001            | 8    |
| (i)  | GO:0007243  | intracellular protein kinase cascade         | 856      | 39       | 6,3      | 32,7     | 8,20E-21 | <0.001            | 6,2  |
| (i)  | GO:0010033  | response to organic substance                | 1788     | 53       | 13,1     | 39,9     | 4,30E-20 | <0.001            | 4    |
| (i)  | GO:0033993  | response to lipid                            | 515      | 31       | 3,8      | 27,2     | 6,00E-20 | <0.001            | 8,2  |
| (i)  | GO:0007165  | signal transduction                          | 3890     | 77       | 28,5     | 48,5     | 6,10E-20 | <0.001            | 2,7  |
| (i)  | GO:0042221  | response to chemical stimulus                | 2611     | 63       | 19,1     | 43,9     | 9,40E-20 | <0.001            | 3,3  |
| (i)  | GO:0071310  | cellular response to organic substance       | 1278     | 44       | 9,4      | 34,6     | 7,60E-19 | <0.001            | 4,7  |
| (i)  | GO:0070887  | cellular response to chemical stimulus       | 1620     | 49       | 11,9     | 37,1     | 8,80E-19 | <0.001            | 4,1  |
| (i)  | GO:0051246  | regulation of protein metabolic process      | 1420     | 46       | 10,4     | 35,6     | 1,00E-18 | <0.001            | 4,4  |
| (i)  | GO:0051716  | cellular response to stimulus                | 4722     | 83       | 34,6     | 48,4     | 1,10E-18 | <0.001            | 2,4  |
| (i)  | GO:0009611  | response to wounding                         | 1063     | 40       | 7,8      | 32,2     | 2,10E-18 | <0.001            | 5,1  |
| (i)  | GO:0007154  | cell communication                           | 4463     | 80       | 32,7     | 47,3     | 3,10E-18 | <0.001            | 2,4  |
| (i)  | GO:0002237  | response to molecule of bacterial origin     | 208      | 21       | 1,5      | 19,5     | 3,10E-18 | <0.001            | 13,8 |
| (i)  | GO:0044700  | single organism signaling                    | 4362     | 79       | 32       | 47       | 3,40E-18 | <0.001            | 2,5  |
| (i)  | GO:0050794  | regulation of cellular process               | 7076     | 101      | 51,9     | 49,1     | 5,10E-18 | <0.001            | 1,9  |
| (i)  | GO:0006952  | defense response                             | 1045     | 39       | 7,7      | 31,3     | 8,40E-18 | <0.001            | 5,1  |
| (i)  | GO:0006954  | inflammatory response                        | 479      | 28       | 3,5      | 24,5     | 1,00E-17 | <0.001            | 8    |
| (i)  | GO:0009607  | response to biotic stimulus                  | 570      | 30       | 4,2      | 25,8     | 1,10E-17 | <0.001            | 7,2  |
| (i)  | GO:0009605  | response to external stimulus                | 1190     | 41       | 8,7      | 32,3     | 1,70E-17 | <0.001            | 4,7  |
| (i)  | GO:0065009  | regulation of molecular function             | 1741     | 49       | 12,8     | 36,2     | 1,70E-17 | <0.001            | 3,8  |

|     |            |                                                                           |      |     |      |      |          |        |      |
|-----|------------|---------------------------------------------------------------------------|------|-----|------|------|----------|--------|------|
| (i) | GO:0032496 | response to lipopolysaccharide                                            | 197  | 20  | 1,4  | 18,6 | 1,90E-17 | <0.001 | 13,9 |
| (i) | GO:0010627 | regulation of intracellular protein kinase cascade                        | 684  | 32  | 5    | 27   | 2,30E-17 | <0.001 | 6,4  |
| (i) | GO:0044092 | negative regulation of molecular function                                 | 647  | 31  | 4,7  | 26,3 | 4,10E-17 | <0.001 | 6,5  |
| (i) | GO:0050789 | regulation of biological process                                          | 7458 | 102 | 54,7 | 47,3 | 7,70E-17 | <0.001 | 1,9  |
| (i) | GO:0009617 | response to bacterium                                                     | 321  | 23  | 2,4  | 20,6 | 1,40E-16 | <0.001 | 9,8  |
| (i) | GO:0009628 | response to abiotic stimulus                                              | 731  | 32  | 5,4  | 26,6 | 1,60E-16 | <0.001 | 6    |
| (i) | GO:0051707 | response to other organism                                                | 546  | 28  | 4    | 24   | 3,00E-16 | <0.001 | 7    |
| (i) | GO:0048583 | regulation of response to stimulus                                        | 2196 | 53  | 16,1 | 36,9 | 3,70E-16 | <0.001 | 3,3  |
| (i) | GO:0006955 | immune response                                                           | 1000 | 36  | 7,3  | 28,7 | 6,50E-16 | <0.001 | 4,9  |
| (i) | GO:0002682 | regulation of immune system process                                       | 832  | 33  | 6,1  | 26,9 | 8,50E-16 | <0.001 | 5,4  |
| (i) | GO:0035556 | intracellular signal transduction                                         | 1854 | 48  | 13,6 | 34,4 | 1,10E-15 | <0.001 | 3,5  |
| (i) | GO:0042325 | regulation of phosphorylation                                             | 841  | 33  | 6,2  | 26,8 | 1,20E-15 | <0.001 | 5,4  |
| (i) | GO:0001932 | regulation of protein phosphorylation                                     | 787  | 32  | 5,8  | 26,2 | 1,30E-15 | <0.001 | 5,5  |
| (i) | GO:0031324 | negative regulation of cellular metabolic process                         | 1282 | 40  | 9,4  | 30,6 | 1,30E-15 | <0.001 | 4,3  |
| (i) | GO:0019222 | regulation of metabolic process                                           | 4487 | 76  | 32,9 | 43,1 | 1,60E-15 | <0.001 | 2,3  |
| (i) | GO:0051090 | regulation of sequence-specific DNA binding transcription factor activity | 324  | 22  | 2,4  | 19,6 | 2,20E-15 | <0.001 | 9,3  |
| (i) | GO:0005125 | cytokine activity                                                         | 188  | 18  | 1,4  | 16,6 | 2,40E-15 | <0.001 | 13,1 |
| (i) | GO:0023051 | regulation of signaling                                                   | 1918 | 48  | 14,1 | 33,9 | 4,30E-15 | <0.001 | 3,4  |
| (i) | GO:0009966 | regulation of signal transduction                                         | 1690 | 45  | 12,4 | 32,6 | 4,60E-15 | <0.001 | 3,6  |
| (i) | GO:0010646 | regulation of cell communication                                          | 1927 | 48  | 14,1 | 33,9 | 5,20E-15 | <0.001 | 3,4  |
| (i) | GO:0044707 | single-multicellular organism process                                     | 5039 | 80  | 36,9 | 43,1 | 5,70E-15 | <0.001 | 2,2  |
| (i) | GO:0060255 | regulation of macromolecule metabolic process                             | 3891 | 69  | 28,5 | 40,5 | 1,10E-14 | <0.001 | 2,4  |
| (i) | GO:0051239 | regulation of multicellular organismal process                            | 1742 | 45  | 12,8 | 32,2 | 1,40E-14 | <0.001 | 3,5  |
| (i) | GO:0080090 | regulation of primary metabolic process                                   | 4014 | 70  | 29,4 | 40,6 | 1,40E-14 | <0.001 | 2,4  |
| (i) | GO:0042326 | negative regulation of phosphorylation                                    | 211  | 18  | 1,5  | 16,5 | 1,80E-14 | <0.001 | 11,6 |
| (i) | GO:0009892 | negative regulation of metabolic process                                  | 1386 | 40  | 10,2 | 29,8 | 1,80E-14 | <0.001 | 3,9  |
| (i) | GO:0050793 | regulation of developmental process                                       | 1403 | 40  | 10,3 | 29,7 | 2,70E-14 | <0.001 | 3,9  |
| (i) | GO:0009893 | positive regulation of metabolic process                                  | 1934 | 47  | 14,2 | 32,8 | 2,90E-14 | <0.001 | 3,3  |
| (i) | GO:0010563 | negative regulation of phosphorus metabolic process                       | 252  | 19  | 1,8  | 17,2 | 3,10E-14 | <0.001 | 10,3 |
| (i) | GO:0045936 | negative regulation of phosphate metabolic process                        | 252  | 19  | 1,8  | 17,2 | 3,10E-14 | <0.001 | 10,3 |
| (i) | GO:0006468 | protein phosphorylation                                                   | 1078 | 35  | 7,9  | 27,1 | 4,00E-14 | <0.001 | 4,4  |
| (i) | GO:0016310 | phosphorylation                                                           | 1211 | 37  | 8,9  | 28,1 | 4,00E-14 | <0.001 | 4,2  |

|     |            |                                                        |      |     |      |      |          |        |      |
|-----|------------|--------------------------------------------------------|------|-----|------|------|----------|--------|------|
| (i) | GO:0008285 | negative regulation of cell proliferation              | 510  | 25  | 3,7  | 21,3 | 4,10E-14 | <0.001 | 6,7  |
| (i) | GO:0048731 | system development                                     | 3199 | 61  | 23,4 | 37,6 | 4,70E-14 | <0.001 | 2,6  |
| (i) | GO:0071216 | cellular response to biotic stimulus                   | 109  | 14  | 0,8  | 13,2 | 5,70E-14 | <0.001 | 17,5 |
| (i) | GO:0010605 | negative regulation of macromolecule metabolic process | 1294 | 38  | 9,5  | 28,5 | 5,80E-14 | <0.001 | 4    |
| (i) | GO:0032268 | regulation of cellular protein metabolic process       | 1240 | 37  | 9,1  | 27,9 | 8,40E-14 | <0.001 | 4,1  |
| (i) | GO:0031323 | regulation of cellular metabolic process               | 4071 | 69  | 29,8 | 39,2 | 1,10E-13 | <0.001 | 2,3  |
| (i) | GO:0008284 | positive regulation of cell proliferation              | 638  | 27  | 4,7  | 22,3 | 1,20E-13 | <0.001 | 5,8  |
| (i) | GO:0005126 | cytokine receptor binding                              | 203  | 17  | 1,5  | 15,5 | 1,40E-13 | <0.001 | 11,4 |
| (i) | GO:0048513 | organ development                                      | 2275 | 50  | 16,7 | 33,3 | 1,50E-13 | <0.001 | 3    |
| (i) | GO:0031399 | regulation of protein modification process             | 999  | 33  | 7,3  | 25,7 | 1,60E-13 | <0.001 | 4,5  |
| (i) | GO:0007166 | cell surface receptor signaling pathway                | 2197 | 49  | 16,1 | 32,9 | 1,70E-13 | <0.001 | 3    |
| (i) | GO:0007275 | multicellular organismal development                   | 3694 | 65  | 27,1 | 37,9 | 1,80E-13 | <0.001 | 2,4  |
| (i) | GO:0044763 | single-organism cellular process                       | 8856 | 106 | 64,9 | 41,1 | 2,40E-13 | <0.001 | 1,6  |
| (i) | GO:1901700 | response to oxygen-containing compound                 | 958  | 32  | 7    | 25   | 2,90E-13 | <0.001 | 4,6  |
| (i) | GO:0033554 | cellular response to stress                            | 1155 | 35  | 8,5  | 26,5 | 3,00E-13 | <0.001 | 4,1  |
| (i) | GO:0001817 | regulation of cytokine production                      | 370  | 21  | 2,7  | 18,3 | 3,30E-13 | <0.001 | 7,7  |
| (i) | GO:0001816 | cytokine production                                    | 416  | 22  | 3    | 19   | 3,60E-13 | <0.001 | 7,2  |
| (i) | GO:0002684 | positive regulation of immune system process           | 514  | 24  | 3,8  | 20,2 | 4,00E-13 | <0.001 | 6,4  |
| (i) | GO:0005515 | protein binding                                        | 6790 | 91  | 49,8 | 41,2 | 4,20E-13 | <0.001 | 1,8  |
| (i) | GO:0031325 | positive regulation of cellular metabolic process      | 1835 | 44  | 13,4 | 30,6 | 4,20E-13 | <0.001 | 3,3  |
| (i) | GO:0044767 | single-organism developmental process                  | 3263 | 60  | 23,9 | 36,1 | 4,60E-13 | <0.001 | 2,5  |
| (i) | GO:0002520 | immune system development                              | 570  | 25  | 4,2  | 20,8 | 4,90E-13 | <0.001 | 6    |
| (i) | GO:0048856 | anatomical structure development                       | 3671 | 64  | 26,9 | 37,1 | 5,20E-13 | <0.001 | 2,4  |
| (i) | GO:0009612 | response to mechanical stimulus                        | 131  | 14  | 1    | 13   | 7,60E-13 | <0.001 | 14,6 |
| (i) | GO:0070482 | response to oxygen levels                              | 229  | 17  | 1,7  | 15,3 | 9,80E-13 | <0.001 | 10,1 |
| (i) | GO:0001933 | negative regulation of protein phosphorylation         | 196  | 16  | 1,4  | 14,6 | 1,10E-12 | <0.001 | 11,1 |
| (i) | GO:0048534 | hematopoietic or lymphoid organ development            | 540  | 24  | 4    | 20   | 1,20E-12 | <0.001 | 6,1  |
| (i) | GO:0009719 | response to endogenous stimulus                        | 1018 | 32  | 7,5  | 24,5 | 1,50E-12 | <0.001 | 4,3  |
| (i) | GO:0048584 | positive regulation of response to stimulus            | 1091 | 33  | 8    | 25   | 1,80E-12 | <0.001 | 4,1  |
| (i) | GO:0005615 | extracellular space                                    | 777  | 28  | 5,7  | 22,3 | 1,90E-12 | <0.001 | 4,9  |
| (i) | GO:0007167 | enzyme linked receptor protein signaling pathway       | 845  | 29  | 6,2  | 22,8 | 2,40E-12 | <0.001 | 4,7  |
| (i) | GO:0030097 | hemopoiesis                                            | 509  | 23  | 3,7  | 19,3 | 2,60E-12 | <0.001 | 6,2  |
| (i) | GO:0001944 | vasculature development                                | 513  | 23  | 3,8  | 19,2 | 3,00E-12 | <0.001 | 6,1  |
| (i) | GO:0002521 | leukocyte differentiation                              | 328  | 19  | 2,4  | 16,6 | 3,40E-12 | <0.001 | 7,9  |
| (i) | GO:0019220 | regulation of phosphate metabolic process              | 1189 | 34  | 8,7  | 25,3 | 3,60E-12 | <0.001 | 3,9  |

|     |            |                                                                |      |    |      |      |          |        |      |
|-----|------------|----------------------------------------------------------------|------|----|------|------|----------|--------|------|
| (i) | GO:0071222 | cellular response to lipopolysaccharide                        | 93   | 12 | 0,7  | 11,3 | 3,70E-12 | <0.001 | 17,6 |
| (i) | GO:0030099 | myeloid cell differentiation                                   | 249  | 17 | 1,8  | 15,2 | 3,80E-12 | <0.001 | 9,3  |
| (i) | GO:0045595 | regulation of cell differentiation                             | 991  | 31 | 7,3  | 23,7 | 4,10E-12 | <0.001 | 4,3  |
| (i) | GO:0008083 | growth factor activity                                         | 149  | 14 | 1,1  | 12,9 | 4,50E-12 | <0.001 | 12,8 |
| (i) | GO:0001666 | response to hypoxia                                            | 215  | 16 | 1,6  | 14,4 | 4,60E-12 | <0.001 | 10,2 |
| (i) | GO:0010604 | positive regulation of macromolecule metabolic process         | 1804 | 42 | 13,2 | 28,8 | 4,60E-12 | <0.001 | 3,2  |
| (i) | GO:0051174 | regulation of phosphorus metabolic process                     | 1201 | 34 | 8,8  | 25,2 | 4,80E-12 | <0.001 | 3,9  |
| (i) | GO:0036293 | response to decreased oxygen levels                            | 217  | 16 | 1,6  | 14,4 | 5,30E-12 | <0.001 | 10,1 |
| (i) | GO:0006366 | transcription from RNA polymerase II promoter                  | 1365 | 36 | 10   | 26   | 7,40E-12 | <0.001 | 3,6  |
| (i) | GO:0071219 | cellular response to molecule of bacterial origin              | 99   | 12 | 0,7  | 11,3 | 7,80E-12 | <0.001 | 16,5 |
| (i) | GO:0001568 | blood vessel development                                       | 488  | 22 | 3,6  | 18,4 | 8,50E-12 | <0.001 | 6,2  |
| (i) | GO:0044421 | extracellular region part                                      | 1027 | 31 | 7,5  | 23,5 | 1,00E-11 | <0.001 | 4,1  |
| (i) | GO:0080134 | regulation of response to stress                               | 715  | 26 | 5,2  | 20,8 | 1,10E-11 | <0.001 | 5    |
| (i) | GO:0050790 | regulation of catalytic activity                               | 1387 | 36 | 10,2 | 25,8 | 1,20E-11 | <0.001 | 3,5  |
| (i) | GO:0051094 | positive regulation of developmental process                   | 668  | 25 | 4,9  | 20,1 | 1,60E-11 | <0.001 | 5,1  |
| (i) | GO:0051240 | positive regulation of multicellular organismal process        | 505  | 22 | 3,7  | 18,3 | 1,70E-11 | <0.001 | 5,9  |
| (i) | GO:0051248 | negative regulation of protein metabolic process               | 465  | 21 | 3,4  | 17,6 | 2,60E-11 | <0.001 | 6,2  |
| (i) | GO:0071396 | cellular response to lipid                                     | 209  | 15 | 1,5  | 13,5 | 3,70E-11 | <0.001 | 9,8  |
| (i) | GO:0072358 | cardiovascular system development                              | 756  | 26 | 5,5  | 20,5 | 3,80E-11 | <0.001 | 4,7  |
| (i) | GO:0072359 | circulatory system development                                 | 756  | 26 | 5,5  | 20,5 | 3,80E-11 | <0.001 | 4,7  |
| (i) | GO:0051247 | positive regulation of protein metabolic process               | 883  | 28 | 6,5  | 21,5 | 4,00E-11 | <0.001 | 4,3  |
| (i) | GO:2000026 | regulation of multicellular organismal development             | 1089 | 31 | 8    | 23   | 4,50E-11 | <0.001 | 3,9  |
| (i) | GO:0051171 | regulation of nitrogen compound metabolic process              | 3223 | 56 | 23,6 | 32,4 | 4,70E-11 | <0.001 | 2,4  |
| (i) | GO:0010942 | positive regulation of cell death                              | 435  | 20 | 3,2  | 16,8 | 5,80E-11 | <0.001 | 6,3  |
| (i) | GO:0045859 | regulation of protein kinase activity                          | 596  | 23 | 4,4  | 18,6 | 6,20E-11 | <0.001 | 5,3  |
| (i) | GO:0010741 | negative regulation of intracellular protein kinase cascade    | 148  | 13 | 1,1  | 11,9 | 6,40E-11 | <0.001 | 12   |
| (i) | GO:0019219 | regulation of nucleobase-containing compound metabolic process | 3149 | 55 | 23,1 | 31,9 | 6,50E-11 | <0.001 | 2,4  |
| (i) | GO:0048660 | regulation of smooth muscle cell proliferation                 | 69   | 10 | 0,5  | 9,5  | 7,50E-11 | <0.001 | 19,8 |
| (i) | GO:0014070 | response to organic cyclic compound                            | 494  | 21 | 3,6  | 17,4 | 7,90E-11 | <0.001 | 5,8  |
| (i) | GO:0006357 | regulation of transcription from RNA polymerase II promoter    | 1185 | 32 | 8,7  | 23,3 | 7,90E-11 | <0.001 | 3,7  |

|     |            |                                                                                    |      |    |      |      |          |        |      |
|-----|------------|------------------------------------------------------------------------------------|------|----|------|------|----------|--------|------|
| (i) | GO:0006469 | negative regulation of protein kinase activity                                     | 151  | 13 | 1,1  | 11,9 | 8,30E-11 | <0.001 | 11,7 |
| (i) | GO:0043086 | negative regulation of catalytic activity                                          | 502  | 21 | 3,7  | 17,3 | 1,10E-10 | <0.001 | 5,7  |
| (i) | GO:0048659 | smooth muscle cell proliferation                                                   | 72   | 10 | 0,5  | 9,5  | 1,20E-10 | <0.001 | 19   |
| (i) | GO:0032269 | negative regulation of cellular protein metabolic process                          | 408  | 19 | 3    | 16   | 1,50E-10 | <0.001 | 6,4  |
| (i) | GO:0043549 | regulation of kinase activity                                                      | 623  | 23 | 4,6  | 18,4 | 1,50E-10 | <0.001 | 5    |
| (i) | GO:0033673 | negative regulation of kinase activity                                             | 161  | 13 | 1,2  | 11,8 | 1,90E-10 | <0.001 | 11   |
| (i) | GO:0031347 | regulation of defense response                                                     | 414  | 19 | 3    | 16   | 1,90E-10 | <0.001 | 6,3  |
| (i) | GO:0010556 | regulation of macromolecule biosynthetic process                                   | 2948 | 52 | 21,6 | 30,4 | 2,10E-10 | <0.001 | 2,4  |
| (i) | GO:0051173 | positive regulation of nitrogen compound metabolic process                         | 1160 | 31 | 8,5  | 22,5 | 2,20E-10 | <0.001 | 3,6  |
| (i) | GO:0002573 | myeloid leukocyte differentiation                                                  | 132  | 12 | 1    | 11   | 2,40E-10 | <0.001 | 12,4 |
| (i) | GO:0043068 | positive regulation of programmed cell death                                       | 420  | 19 | 3,1  | 15,9 | 2,40E-10 | <0.001 | 6,2  |
| (i) | GO:0009653 | anatomical structure morphogenesis                                                 | 1962 | 41 | 14,4 | 26,6 | 2,70E-10 | <0.001 | 2,9  |
| (i) | GO:2000112 | regulation of cellular macromolecule biosynthetic process                          | 2876 | 51 | 21,1 | 29,9 | 2,80E-10 | <0.001 | 2,4  |
| (i) | GO:0051338 | regulation of transferase activity                                                 | 644  | 23 | 4,7  | 18,3 | 2,90E-10 | <0.001 | 4,9  |
| (i) | GO:0048514 | blood vessel morphogenesis                                                         | 427  | 19 | 3,1  | 15,9 | 3,20E-10 | <0.001 | 6,1  |
| (i) | GO:0042493 | response to drug                                                                   | 332  | 17 | 2,4  | 14,6 | 3,50E-10 | <0.001 | 7    |
| (i) | GO:0009889 | regulation of biosynthetic process                                                 | 3091 | 53 | 22,7 | 30,3 | 3,60E-10 | <0.001 | 2,3  |
| (i) | GO:0051348 | negative regulation of transferase activity                                        | 172  | 13 | 1,3  | 11,7 | 4,20E-10 | <0.001 | 10,3 |
| (i) | GO:0048661 | positive regulation of smooth muscle cell proliferation                            | 41   | 8  | 0,3  | 7,7  | 5,30E-10 | <0.001 | 26,6 |
| (i) | GO:0065008 | regulation of biological quality                                                   | 2462 | 46 | 18   | 28   | 6,00E-10 | <0.001 | 2,5  |
| (i) | GO:0043433 | negative regulation of sequence-specific DNA binding transcription factor activity | 112  | 11 | 0,8  | 10,2 | 6,10E-10 | <0.001 | 13,4 |
| (i) | GO:0002224 | toll-like receptor signaling pathway                                               | 113  | 11 | 0,8  | 10,2 | 6,70E-10 | <0.001 | 13,3 |
| (i) | GO:0045429 | positive regulation of nitric oxide biosynthetic process                           | 27   | 7  | 0,2  | 6,8  | 7,60E-10 | <0.001 | 35,4 |
| (i) | GO:0031326 | regulation of cellular biosynthetic process                                        | 3065 | 52 | 22,5 | 29,5 | 8,60E-10 | <0.001 | 2,3  |
| (i) | GO:0001525 | angiogenesis                                                                       | 354  | 17 | 2,6  | 14,4 | 9,30E-10 | <0.001 | 6,6  |
| (i) | GO:0048585 | negative regulation of response to stimulus                                        | 748  | 24 | 5,5  | 18,5 | 9,60E-10 | <0.001 | 4,4  |
| (i) | GO:0023056 | positive regulation of signaling                                                   | 814  | 25 | 6    | 19   | 1,00E-09 | <0.001 | 4,2  |
| (i) | GO:0071495 | cellular response to endogenous stimulus                                           | 688  | 23 | 5    | 18   | 1,00E-09 | <0.001 | 4,6  |
| (i) | GO:0010647 | positive regulation of cell communication                                          | 816  | 25 | 6    | 19   | 1,10E-09 | <0.001 | 4,2  |
| (i) | GO:0009059 | macromolecule biosynthetic process                                                 | 3909 | 60 | 28,6 | 31,4 | 1,10E-09 | <0.001 | 2,1  |

|     |            |                                                       |      |    |      |      |          |        |      |
|-----|------------|-------------------------------------------------------|------|----|------|------|----------|--------|------|
| (i) | GO:0044271 | cellular nitrogen compound biosynthetic process       | 3387 | 55 | 24,8 | 30,2 | 1,10E-09 | <0.001 | 2,2  |
| (i) | GO:0009891 | positive regulation of biosynthetic process           | 1239 | 31 | 9,1  | 21,9 | 1,10E-09 | <0.001 | 3,4  |
| (i) | GO:0031349 | positive regulation of defense response               | 225  | 14 | 1,6  | 12,4 | 1,10E-09 | <0.001 | 8,5  |
| (i) | GO:0000165 | MAPK cascade                                          | 516  | 20 | 3,8  | 16,2 | 1,20E-09 | <0.001 | 5,3  |
| (i) | GO:0031400 | negative regulation of protein modification process   | 315  | 16 | 2,3  | 13,7 | 1,30E-09 | <0.001 | 6,9  |
| (i) | GO:0043065 | positive regulation of apoptotic process              | 414  | 18 | 3    | 15   | 1,40E-09 | <0.001 | 5,9  |
| (i) | GO:0006351 | transcription, DNA-dependent                          | 2914 | 50 | 21,4 | 28,6 | 1,50E-09 | <0.001 | 2,3  |
| (i) | GO:0030154 | cell differentiation                                  | 2538 | 46 | 18,6 | 27,4 | 1,60E-09 | <0.001 | 2,5  |
| (i) | GO:0014074 | response to purine-containing compound                | 94   | 10 | 0,7  | 9,3  | 1,70E-09 | <0.001 | 14,5 |
| (i) | GO:0006355 | regulation of transcription, DNA-dependent            | 2639 | 47 | 19,3 | 27,7 | 1,80E-09 | <0.001 | 2,4  |
| (i) | GO:2001141 | regulation of RNA biosynthetic process                | 2657 | 47 | 19,5 | 27,5 | 2,20E-09 | <0.001 | 2,4  |
| (i) | GO:0010628 | positive regulation of gene expression                | 1054 | 28 | 7,7  | 20,3 | 2,20E-09 | <0.001 | 3,6  |
| (i) | GO:0045321 | leukocyte activation                                  | 539  | 20 | 4    | 16   | 2,50E-09 | <0.001 | 5,1  |
| (i) | GO:0009888 | tissue development                                    | 1211 | 30 | 8,9  | 21,1 | 2,70E-09 | <0.001 | 3,4  |
| (i) | GO:0002221 | pattern recognition receptor signaling pathway        | 129  | 11 | 0,9  | 10,1 | 2,80E-09 | <0.001 | 11,6 |
| (i) | GO:1901701 | cellular response to oxygen-containing compound       | 603  | 21 | 4,4  | 16,6 | 2,90E-09 | <0.001 | 4,8  |
| (i) | GO:0031328 | positive regulation of cellular biosynthetic process  | 1220 | 30 | 8,9  | 21,1 | 3,20E-09 | <0.001 | 3,4  |
| (i) | GO:0048545 | response to steroid hormone stimulus                  | 245  | 14 | 1,8  | 12,2 | 3,40E-09 | <0.001 | 7,8  |
| (i) | GO:0002758 | innate immune response-activating signal transduction | 132  | 11 | 1    | 10   | 3,50E-09 | <0.001 | 11,4 |
| (i) | GO:0048869 | cellular developmental process                        | 2697 | 47 | 19,8 | 27,2 | 3,60E-09 | <0.001 | 2,4  |
| (i) | GO:0032774 | RNA biosynthetic process                              | 2990 | 50 | 21,9 | 28,1 | 3,60E-09 | <0.001 | 2,3  |
| (i) | GO:0010468 | regulation of gene expression                         | 3095 | 51 | 22,7 | 28,3 | 3,90E-09 | <0.001 | 2,2  |
| (i) | GO:0097305 | response to alcohol                                   | 207  | 13 | 1,5  | 11,5 | 4,10E-09 | <0.001 | 8,6  |
| (i) | GO:0051252 | regulation of RNA metabolic process                   | 2712 | 47 | 19,9 | 27,1 | 4,30E-09 | <0.001 | 2,4  |
| (i) | GO:0010038 | response to metal ion                                 | 209  | 13 | 1,5  | 11,5 | 4,60E-09 | <0.001 | 8,5  |
| (i) | GO:0007249 | I-kappaB kinase/NF-kappaB cascade                     | 212  | 13 | 1,6  | 11,4 | 5,50E-09 | <0.001 | 8,4  |
| (i) | GO:0031663 | lipopolysaccharide-mediated signaling pathway         | 35   | 7  | 0,3  | 6,7  | 5,50E-09 | <0.001 | 27,3 |
| (i) | GO:0009314 | response to radiation                                 | 300  | 15 | 2,2  | 12,8 | 5,60E-09 | <0.001 | 6,8  |
| (i) | GO:0043170 | macromolecule metabolic process                       | 6694 | 82 | 49,1 | 32,9 | 5,90E-09 | <0.001 | 1,7  |
| (i) | GO:0002218 | activation of innate immune response                  | 140  | 11 | 1    | 10   | 6,60E-09 | <0.001 | 10,7 |
| (i) | GO:0050776 | regulation of immune response                         | 513  | 19 | 3,8  | 15,2 | 6,60E-09 | <0.001 | 5,1  |
| (i) | GO:0033002 | muscle cell proliferation                             | 108  | 10 | 0,8  | 9,2  | 6,70E-09 | <0.001 | 12,6 |

|     |            |                                                                                    |      |    |      |      |          |        |      |
|-----|------------|------------------------------------------------------------------------------------|------|----|------|------|----------|--------|------|
| (i) | GO:0034654 | nucleobase-containing compound biosynthetic process                                | 3253 | 52 | 23,8 | 28,2 | 7,30E-09 | <0.001 | 2,2  |
| (i) | GO:0051091 | positive regulation of sequence-specific DNA binding transcription factor activity | 178  | 12 | 1,3  | 10,7 | 7,50E-09 | <0.001 | 9,2  |
| (i) | GO:0045428 | regulation of nitric oxide biosynthetic process                                    | 37   | 7  | 0,3  | 6,7  | 8,30E-09 | <0.001 | 25,8 |
| (i) | GO:0023057 | negative regulation of signaling                                                   | 642  | 21 | 4,7  | 16,3 | 8,80E-09 | <0.001 | 4,5  |
| (i) | GO:0010648 | negative regulation of cell communication                                          | 646  | 21 | 4,7  | 16,3 | 9,80E-09 | <0.001 | 4,4  |
| (i) | GO:0051051 | negative regulation of transport                                                   | 269  | 14 | 2    | 12   | 1,10E-08 | <0.001 | 7,1  |
| (i) | GO:0071900 | regulation of protein serine/threonine kinase activity                             | 367  | 16 | 2,7  | 13,3 | 1,20E-08 | <0.001 | 5,9  |
| (i) | GO:0046683 | response to organophosphorus                                                       | 85   | 9  | 0,6  | 8,4  | 1,20E-08 | <0.001 | 14,4 |
| (i) | GO:0034097 | response to cytokine stimulus                                                      | 476  | 18 | 3,5  | 14,5 | 1,20E-08 | <0.001 | 5,2  |
| (i) | GO:0001893 | maternal placenta development                                                      | 23   | 6  | 0,2  | 5,8  | 1,30E-08 | <0.001 | 35,6 |
| (i) | GO:0019438 | aromatic compound biosynthetic process                                             | 3306 | 52 | 24,2 | 27,8 | 1,30E-08 | <0.001 | 2,1  |
| (i) | GO:0071496 | cellular response to external stimulus                                             | 187  | 12 | 1,4  | 10,6 | 1,30E-08 | <0.001 | 8,8  |
| (i) | GO:0019538 | protein metabolic process                                                          | 3624 | 55 | 26,6 | 28,4 | 1,30E-08 | <0.001 | 2,1  |
| (i) | GO:0018130 | heterocycle biosynthetic process                                                   | 3313 | 52 | 24,3 | 27,7 | 1,40E-08 | <0.001 | 2,1  |
| (i) | GO:0010557 | positive regulation of macromolecule biosynthetic process                          | 1146 | 28 | 8,4  | 19,6 | 1,40E-08 | <0.001 | 3,3  |
| (i) | GO:0034142 | toll-like receptor 4 signaling pathway                                             | 87   | 9  | 0,6  | 8,4  | 1,50E-08 | <0.001 | 14,1 |
| (i) | GO:0010740 | positive regulation of intracellular protein kinase cascade                        | 482  | 18 | 3,5  | 14,5 | 1,50E-08 | <0.001 | 5,1  |
| (i) | GO:0005102 | receptor binding                                                                   | 1077 | 27 | 7,9  | 19,1 | 1,50E-08 | <0.001 | 3,4  |
| (i) | GO:0032879 | regulation of localization                                                         | 1311 | 30 | 9,6  | 20,4 | 1,70E-08 | <0.001 | 3,1  |
| (i) | GO:0045597 | positive regulation of cell differentiation                                        | 488  | 18 | 3,6  | 14,4 | 1,80E-08 | <0.001 | 5    |
| (i) | GO:0001775 | cell activation                                                                    | 738  | 22 | 5,4  | 16,6 | 2,00E-08 | <0.001 | 4,1  |
| (i) | GO:0001934 | positive regulation of protein phosphorylation                                     | 550  | 19 | 4    | 15   | 2,00E-08 | <0.001 | 4,7  |
| (i) | GO:0009968 | negative regulation of signal transduction                                         | 613  | 20 | 4,5  | 15,5 | 2,10E-08 | <0.001 | 4,5  |
| (i) | GO:0001819 | positive regulation of cytokine production                                         | 196  | 12 | 1,4  | 10,6 | 2,20E-08 | <0.001 | 8,4  |
| (i) | GO:0034504 | protein localization to nucleus                                                    | 240  | 13 | 1,8  | 11,2 | 2,40E-08 | <0.001 | 7,4  |
| (i) | GO:0071901 | negative regulation of protein serine/threonine kinase activity                    | 92   | 9  | 0,7  | 8,3  | 2,40E-08 | <0.001 | 13,3 |
| (i) | GO:0048646 | anatomical structure formation involved in morphogenesis                           | 815  | 23 | 6    | 17   | 2,50E-08 | <0.001 | 3,9  |
| (i) | GO:0034645 | cellular macromolecule biosynthetic process                                        | 3798 | 56 | 27,8 | 28,2 | 2,60E-08 | <0.001 | 2    |
| (i) | GO:0045944 | positive regulation of transcription from RNA polymerase II promoter               | 684  | 21 | 5    | 16   | 2,60E-08 | <0.001 | 4,2  |
| (i) | GO:0042035 | regulation of cytokine biosynthetic process                                        | 93   | 9  | 0,7  | 8,3  | 2,70E-08 | <0.001 | 13,2 |

|     |            |                                                                         |      |    |      |      |          |        |      |
|-----|------------|-------------------------------------------------------------------------|------|----|------|------|----------|--------|------|
| (i) | GO:0042327 | positive regulation of phosphorylation                                  | 561  | 19 | 4,1  | 14,9 | 2,80E-08 | <0.001 | 4,6  |
| (i) | GO:0009725 | response to hormone stimulus                                            | 628  | 20 | 4,6  | 15,4 | 3,20E-08 | <0.001 | 4,3  |
| (i) | GO:0043408 | regulation of MAPK cascade                                              | 451  | 17 | 3,3  | 13,7 | 3,40E-08 | <0.001 | 5,1  |
| (i) | GO:0010243 | response to organic nitrogen                                            | 570  | 19 | 4,2  | 14,8 | 3,60E-08 | <0.001 | 4,5  |
| (i) | GO:0045089 | positive regulation of innate immune response                           | 165  | 11 | 1,2  | 9,8  | 3,70E-08 | <0.001 | 9,1  |
| (i) | GO:1901362 | organic cyclic compound biosynthetic process                            | 3410 | 52 | 25   | 27   | 3,70E-08 | <0.001 | 2,1  |
| (i) | GO:0002756 | MyD88-independent toll-like receptor signaling pathway                  | 69   | 8  | 0,5  | 7,5  | 3,90E-08 | <0.001 | 15,8 |
| (i) | GO:0010035 | response to inorganic substance                                         | 297  | 14 | 2,2  | 11,8 | 3,90E-08 | <0.001 | 6,4  |
| (i) | GO:0044744 | protein targeting to nucleus                                            | 207  | 12 | 1,5  | 10,5 | 4,10E-08 | <0.001 | 7,9  |
| (i) | GO:0006606 | protein import into nucleus                                             | 207  | 12 | 1,5  | 10,5 | 4,10E-08 | <0.001 | 7,9  |
| (i) | GO:1900180 | regulation of protein localization to nucleus                           | 131  | 10 | 1    | 9    | 4,30E-08 | <0.001 | 10,4 |
| (i) | GO:0034134 | toll-like receptor 2 signaling pathway                                  | 70   | 8  | 0,5  | 7,5  | 4,30E-08 | <0.001 | 15,6 |
| (i) | GO:0044260 | cellular macromolecule metabolic process                                | 6062 | 75 | 44,4 | 30,6 | 4,40E-08 | <0.001 | 1,7  |
| (i) | GO:0009967 | positive regulation of signal transduction                              | 772  | 22 | 5,7  | 16,3 | 4,40E-08 | <0.001 | 3,9  |
| (i) | GO:1901342 | regulation of vasculature development                                   | 169  | 11 | 1,2  | 9,8  | 4,70E-08 | <0.001 | 8,9  |
| (i) | GO:0051170 | nuclear import                                                          | 210  | 12 | 1,5  | 10,5 | 4,80E-08 | <0.001 | 7,8  |
| (i) | GO:0006809 | nitric oxide biosynthetic process                                       | 47   | 7  | 0,3  | 6,7  | 4,80E-08 | <0.001 | 20,3 |
| (i) | GO:0045935 | positive regulation of nucleobase-containing compound metabolic process | 1141 | 27 | 8,4  | 18,6 | 5,10E-08 | <0.001 | 3,2  |
| (i) | GO:0046697 | decidualization                                                         | 15   | 5  | 0,1  | 4,9  | 5,60E-08 | <0.001 | 45,5 |
| (i) | GO:0006464 | cellular protein modification process                                   | 2356 | 41 | 17,3 | 23,7 | 5,80E-08 | <0.001 | 2,4  |
| (i) | GO:0036211 | protein modification process                                            | 2356 | 41 | 17,3 | 23,7 | 5,80E-08 | <0.001 | 2,4  |
| (i) | GO:0043412 | macromolecule modification                                              | 2454 | 42 | 18   | 24   | 6,00E-08 | <0.001 | 2,3  |
| (i) | GO:0022603 | regulation of anatomical structure morphogenesis                        | 591  | 19 | 4,3  | 14,7 | 6,30E-08 | <0.001 | 4,4  |
| (i) | GO:0044093 | positive regulation of molecular function                               | 1077 | 26 | 7,9  | 18,1 | 6,40E-08 | <0.001 | 3,3  |
| (i) | GO:0051092 | positive regulation of NF-kappaB transcription factor activity          | 103  | 9  | 0,8  | 8,2  | 6,50E-08 | <0.001 | 11,9 |
| (i) | GO:0034138 | toll-like receptor 3 signaling pathway                                  | 74   | 8  | 0,5  | 7,5  | 6,80E-08 | <0.001 | 14,8 |
| (i) | GO:0045088 | regulation of innate immune response                                    | 217  | 12 | 1,6  | 10,4 | 6,80E-08 | <0.001 | 7,5  |
| (i) | GO:0051384 | response to glucocorticoid stimulus                                     | 104  | 9  | 0,8  | 8,2  | 7,10E-08 | <0.001 | 11,8 |
| (i) | GO:0042089 | cytokine biosynthetic process                                           | 104  | 9  | 0,8  | 8,2  | 7,10E-08 | <0.001 | 11,8 |
| (i) | GO:0071363 | cellular response to growth factor stimulus                             | 421  | 16 | 3,1  | 12,9 | 8,00E-08 | <0.001 | 5,2  |
| (i) | GO:0043409 | negative regulation of MAPK cascade                                     | 106  | 9  | 0,8  | 8,2  | 8,40E-08 | <0.001 | 11,6 |
| (i) | GO:0051254 | positive regulation of RNA metabolic process                            | 1018 | 25 | 7,5  | 17,5 | 8,60E-08 | <0.001 | 3,4  |



|     |            |                                                           |      |    |      |      |          |        |      |
|-----|------------|-----------------------------------------------------------|------|----|------|------|----------|--------|------|
| (i) | GO:0032270 | positive regulation of cellular protein metabolic process | 802  | 22 | 5,9  | 16,1 | 8,60E-08 | <0.001 | 3,7  |
| (i) | GO:1901698 | response to nitrogen compound                             | 603  | 19 | 4,4  | 14,6 | 8,70E-08 | <0.001 | 4,3  |
| (i) | GO:0042107 | cytokine metabolic process                                | 107  | 9  | 0,8  | 8,2  | 9,10E-08 | <0.001 | 11,5 |
| (i) | GO:0044706 | multi-multicellular organism process                      | 182  | 11 | 1,3  | 9,7  | 1,00E-07 | <0.001 | 8,2  |
| (i) | GO:0045596 | negative regulation of cell differentiation               | 431  | 16 | 3,2  | 12,8 | 1,10E-07 | <0.001 | 5,1  |
| (i) | GO:0032101 | regulation of response to external stimulus               | 376  | 15 | 2,8  | 12,2 | 1,10E-07 | <0.001 | 5,4  |
| (i) | GO:0002755 | MyD88-dependent toll-like receptor signaling pathway      | 79   | 8  | 0,6  | 7,4  | 1,10E-07 | <0.001 | 13,8 |
| (i) | GO:0031960 | response to corticosteroid stimulus                       | 110  | 9  | 0,8  | 8,2  | 1,20E-07 | <0.001 | 11,2 |
| (i) | GO:0070848 | response to growth factor stimulus                        | 433  | 16 | 3,2  | 12,8 | 1,20E-07 | <0.001 | 5    |
| (i) | GO:0050673 | epithelial cell proliferation                             | 229  | 12 | 1,7  | 10,3 | 1,20E-07 | <0.001 | 7,1  |
| (i) | GO:0045087 | innate immune response                                    | 493  | 17 | 3,6  | 13,4 | 1,20E-07 | <0.001 | 4,7  |
| (i) | GO:0016477 | cell migration                                            | 821  | 22 | 6    | 16   | 1,30E-07 | 0,002  | 3,7  |
| (i) | GO:0045893 | positive regulation of transcription, DNA-dependent       | 973  | 24 | 7,1  | 16,9 | 1,50E-07 | 0,002  | 3,4  |
| (i) | GO:0071456 | cellular response to hypoxia                              | 82   | 8  | 0,6  | 7,4  | 1,50E-07 | 0,002  | 13,3 |
| (i) | GO:0036294 | cellular response to decreased oxygen levels              | 82   | 8  | 0,6  | 7,4  | 1,50E-07 | 0,002  | 13,3 |
| (i) | GO:0043122 | regulation of I-kappaB kinase/NF-kappaB cascade           | 191  | 11 | 1,4  | 9,6  | 1,60E-07 | 0,002  | 7,9  |
| (i) | GO:0050864 | regulation of B cell activation                           | 83   | 8  | 0,6  | 7,4  | 1,70E-07 | 0,002  | 13,2 |
| (i) | GO:0009991 | response to extracellular stimulus                        | 285  | 13 | 2,1  | 10,9 | 1,80E-07 | 0,002  | 6,2  |
| (i) | GO:0048568 | embryonic organ development                               | 337  | 14 | 2,5  | 11,5 | 1,90E-07 | 0,002  | 5,7  |
| (i) | GO:0010562 | positive regulation of phosphorus metabolic process       | 635  | 19 | 4,7  | 14,3 | 1,90E-07 | 0,002  | 4,1  |
| (i) | GO:0045937 | positive regulation of phosphate metabolic process        | 635  | 19 | 4,7  | 14,3 | 1,90E-07 | 0,002  | 4,1  |
| (i) | GO:0017038 | protein import                                            | 239  | 12 | 1,8  | 10,2 | 2,00E-07 | 0,002  | 6,9  |
| (i) | GO:0010467 | gene expression                                           | 4026 | 56 | 29,5 | 26,5 | 2,10E-07 | 0,002  | 1,9  |
| (i) | GO:0045765 | regulation of angiogenesis                                | 155  | 10 | 1,1  | 8,9  | 2,10E-07 | 0,002  | 8,8  |
| (i) | GO:0046649 | lymphocyte activation                                     | 455  | 16 | 3,3  | 12,7 | 2,30E-07 | 0,002  | 4,8  |
| (i) | GO:1901214 | regulation of neuron death                                | 157  | 10 | 1,2  | 8,8  | 2,40E-07 | 0,002  | 8,7  |
| (i) | GO:0002764 | immune response-regulating signaling pathway              | 245  | 12 | 1,8  | 10,2 | 2,50E-07 | 0,002  | 6,7  |
| (i) | GO:0046209 | nitric oxide metabolic process                            | 60   | 7  | 0,4  | 6,6  | 2,70E-07 | 0,002  | 15,9 |
| (i) | GO:0071453 | cellular response to oxygen levels                        | 89   | 8  | 0,7  | 7,3  | 2,90E-07 | 0,002  | 12,3 |
| (i) | GO:0006796 | phosphate-containing compound metabolic process           | 2306 | 39 | 16,9 | 22,1 | 3,00E-07 | 0,002  | 2,3  |
| (i) | GO:0000302 | response to reactive oxygen species                       | 123  | 9  | 0,9  | 8,1  | 3,00E-07 | 0,002  | 10   |

|     |            |                                                                          |      |    |      |      |          |       |      |
|-----|------------|--------------------------------------------------------------------------|------|----|------|------|----------|-------|------|
| (i) | GO:0043405 | regulation of MAP kinase activity                                        | 249  | 12 | 1,8  | 10,2 | 3,00E-07 | 0,002 | 6,6  |
| (i) | GO:0071347 | cellular response to interleukin-1                                       | 38   | 6  | 0,3  | 5,7  | 3,20E-07 | 0,002 | 21,5 |
| (i) | GO:0034641 | cellular nitrogen compound metabolic process                             | 5109 | 65 | 37,4 | 27,6 | 3,30E-07 | 0,002 | 1,7  |
| (i) | GO:0051241 | negative regulation of multicellular organismal process                  | 353  | 14 | 2,6  | 11,4 | 3,30E-07 | 0,002 | 5,4  |
| (i) | GO:0051591 | response to cAMP                                                         | 62   | 7  | 0,5  | 6,5  | 3,40E-07 | 0,002 | 15,4 |
| (i) | GO:0034101 | erythrocyte homeostasis                                                  | 91   | 8  | 0,7  | 7,3  | 3,40E-07 | 0,002 | 12   |
| (i) | GO:0031327 | negative regulation of cellular biosynthetic process                     | 943  | 23 | 6,9  | 16,1 | 3,40E-07 | 0,002 | 3,3  |
| (i) | GO:0051336 | regulation of hydrolase activity                                         | 731  | 20 | 5,4  | 14,6 | 3,70E-07 | 0,002 | 3,7  |
| (i) | GO:0007179 | transforming growth factor beta receptor signaling pathway               | 165  | 10 | 1,2  | 8,8  | 3,80E-07 | 0,002 | 8,3  |
| (i) | GO:0016070 | RNA metabolic process                                                    | 3553 | 51 | 26   | 25   | 4,00E-07 | 0,002 | 2    |
| (i) | GO:0042306 | regulation of protein import into nucleus                                | 127  | 9  | 0,9  | 8,1  | 4,00E-07 | 0,002 | 9,7  |
| (i) | GO:0051093 | negative regulation of developmental process                             | 536  | 17 | 3,9  | 13,1 | 4,00E-07 | 0,002 | 4,3  |
| (i) | GO:0042113 | B cell activation                                                        | 166  | 10 | 1,2  | 8,8  | 4,00E-07 | 0,002 | 8,2  |
| (i) | GO:0009890 | negative regulation of biosynthetic process                              | 954  | 23 | 7    | 16   | 4,20E-07 | 0,002 | 3,3  |
| (i) | GO:0033135 | regulation of peptidyl-serine phosphorylation                            | 64   | 7  | 0,5  | 6,5  | 4,30E-07 | 0,002 | 14,9 |
| (i) | GO:0043407 | negative regulation of MAP kinase activity                               | 64   | 7  | 0,5  | 6,5  | 4,30E-07 | 0,002 | 14,9 |
| (i) | GO:0010574 | regulation of vascular endothelial growth factor production              | 22   | 5  | 0,2  | 4,8  | 4,70E-07 | 0,002 | 31   |
| (i) | GO:0010573 | vascular endothelial growth factor production                            | 22   | 5  | 0,2  | 4,8  | 4,70E-07 | 0,002 | 31   |
| (i) | GO:0051049 | regulation of transport                                                  | 961  | 23 | 7    | 16   | 4,80E-07 | 0,002 | 3,3  |
| (i) | GO:0007178 | transmembrane receptor protein serine/threonine kinase signaling pathway | 260  | 12 | 1,9  | 10,1 | 4,80E-07 | 0,002 | 6,3  |
| (i) | GO:0006793 | phosphorus metabolic process                                             | 2353 | 39 | 17,2 | 21,8 | 5,00E-07 | 0,002 | 2,3  |
| (i) | GO:1901576 | organic substance biosynthetic process                                   | 4696 | 61 | 34,4 | 26,6 | 5,00E-07 | 0,002 | 1,8  |
| (i) | GO:0048870 | cell motility                                                            | 891  | 22 | 6,5  | 15,5 | 5,20E-07 | 0,002 | 3,4  |
| (i) | GO:0051674 | localization of cell                                                     | 891  | 22 | 6,5  | 15,5 | 5,20E-07 | 0,002 | 3,4  |
| (i) | GO:0003700 | sequence-specific DNA binding transcription factor activity              | 892  | 22 | 6,5  | 15,5 | 5,30E-07 | 0,002 | 3,4  |
| (i) | GO:0001890 | placenta development                                                     | 132  | 9  | 1    | 8    | 5,50E-07 | 0,002 | 9,3  |
| (i) | GO:0048872 | homeostasis of number of cells                                           | 172  | 10 | 1,3  | 8,7  | 5,60E-07 | 0,002 | 7,9  |
| (i) | GO:0070851 | growth factor receptor binding                                           | 97   | 8  | 0,7  | 7,3  | 5,60E-07 | 0,002 | 11,3 |
| (i) | GO:0008009 | chemokine activity                                                       | 42   | 6  | 0,3  | 5,7  | 5,90E-07 | 0,002 | 19,5 |
| (i) | GO:0035666 | TRIF-dependent toll-like receptor signaling pathway                      | 67   | 7  | 0,5  | 6,5  | 5,90E-07 | 0,002 | 14,3 |
| (i) | GO:0034130 | toll-like receptor 1 signaling pathway                                   | 67   | 7  | 0,5  | 6,5  | 5,90E-07 | 0,002 | 14,3 |
| (i) | GO:0045637 | regulation of myeloid cell differentiation                               | 133  | 9  | 1    | 8    | 5,90E-07 | 0,002 | 9,2  |

|     |            |                                                                                      |      |    |      |      |          |       |      |
|-----|------------|--------------------------------------------------------------------------------------|------|----|------|------|----------|-------|------|
| (i) | GO:0010558 | negative regulation of macromolecule biosynthetic process                            | 902  | 22 | 6,6  | 15,4 | 6,40E-07 | 0,002 | 3,3  |
| (i) | GO:0042592 | homeostatic process                                                                  | 1215 | 26 | 8,9  | 17,1 | 6,60E-07 | 0,002 | 2,9  |
| (i) | GO:0019221 | cytokine-mediated signaling pathway                                                  | 320  | 13 | 2,3  | 10,7 | 6,70E-07 | 0,002 | 5,5  |
| (i) | GO:0060135 | maternal process involved in female pregnancy                                        | 43   | 6  | 0,3  | 5,7  | 6,80E-07 | 0,002 | 19   |
| (i) | GO:0090304 | nucleic acid metabolic process                                                       | 4054 | 55 | 29,7 | 25,3 | 6,90E-07 | 0,002 | 1,9  |
| (i) | GO:0070997 | neuron death                                                                         | 176  | 10 | 1,3  | 8,7  | 6,90E-07 | 0,002 | 7,8  |
| (i) | GO:0002694 | regulation of leukocyte activation                                                   | 324  | 13 | 2,4  | 10,6 | 7,70E-07 | 0,002 | 5,5  |
| (i) | GO:0046888 | negative regulation of hormone secretion                                             | 44   | 6  | 0,3  | 5,7  | 7,80E-07 | 0,002 | 18,6 |
| (i) | GO:0035872 | nucleotide-binding domain, leucine rich repeat containing receptor signaling pathway | 44   | 6  | 0,3  | 5,7  | 7,80E-07 | 0,002 | 18,6 |
| (i) | GO:0051726 | regulation of cell cycle                                                             | 628  | 18 | 4,6  | 13,4 | 7,80E-07 | 0,002 | 3,9  |
| (i) | GO:0009058 | biosynthetic process                                                                 | 4754 | 61 | 34,8 | 26,2 | 7,90E-07 | 0,002 | 1,8  |
| (i) | GO:0006139 | nucleobase-containing compound metabolic process                                     | 4759 | 61 | 34,9 | 26,1 | 8,20E-07 | 0,002 | 1,7  |
| (i) | GO:0097285 | cell-type specific apoptotic process                                                 | 274  | 12 | 2    | 10   | 8,40E-07 | 0,002 | 6    |
| (i) | GO:0051346 | negative regulation of hydrolase activity                                            | 226  | 11 | 1,7  | 9,3  | 8,80E-07 | 0,002 | 6,6  |
| (i) | GO:0050869 | negative regulation of B cell activation                                             | 25   | 5  | 0,2  | 4,8  | 9,30E-07 | 0,002 | 27,3 |
| (i) | GO:0002695 | negative regulation of leukocyte activation                                          | 104  | 8  | 0,8  | 7,2  | 9,60E-07 | 0,002 | 10,5 |
| (i) | GO:0007568 | aging                                                                                | 184  | 10 | 1,3  | 8,7  | 1,00E-06 | 0,002 | 7,4  |
| (i) | GO:1901654 | response to ketone                                                                   | 73   | 7  | 0,5  | 6,5  | 1,10E-06 | 0,002 | 13,1 |
| (i) | GO:0002757 | immune response-activating signal transduction                                       | 233  | 11 | 1,7  | 9,3  | 1,20E-06 | 0,002 | 6,4  |
| (i) | GO:0031401 | positive regulation of protein modification process                                  | 716  | 19 | 5,2  | 13,8 | 1,20E-06 | 0,002 | 3,6  |
| (i) | GO:0070661 | leukocyte proliferation                                                              | 187  | 10 | 1,4  | 8,6  | 1,20E-06 | 0,002 | 7,3  |
| (i) | GO:0044237 | cellular metabolic process                                                           | 7838 | 85 | 57,4 | 27,6 | 1,20E-06 | 0,002 | 1,5  |
| (i) | GO:0071345 | cellular response to cytokine stimulus                                               | 396  | 14 | 2,9  | 11,1 | 1,30E-06 | 0,002 | 4,8  |
| (i) | GO:0051249 | regulation of lymphocyte activation                                                  | 286  | 12 | 2,1  | 9,9  | 1,30E-06 | 0,002 | 5,7  |
| (i) | GO:0060341 | regulation of cellular localization                                                  | 652  | 18 | 4,8  | 13,2 | 1,30E-06 | 0,002 | 3,8  |
| (i) | GO:0030183 | B cell differentiation                                                               | 76   | 7  | 0,6  | 6,4  | 1,40E-06 | 0,002 | 12,6 |
| (i) | GO:0071560 | cellular response to transforming growth factor beta stimulus                        | 192  | 10 | 1,4  | 8,6  | 1,50E-06 | 0,002 | 7,1  |
| (i) | GO:0070663 | regulation of leukocyte proliferation                                                | 149  | 9  | 1,1  | 7,9  | 1,50E-06 | 0,002 | 8,2  |
| (i) | GO:0052548 | regulation of endopeptidase activity                                                 | 240  | 11 | 1,8  | 9,2  | 1,60E-06 | 0,002 | 6,3  |
| (i) | GO:0006807 | nitrogen compound metabolic process                                                  | 5442 | 66 | 39,9 | 26,1 | 1,60E-06 | 0,002 | 1,7  |
| (i) | GO:0071559 | response to transforming growth factor beta stimulus                                 | 193  | 10 | 1,4  | 8,6  | 1,60E-06 | 0,002 | 7,1  |

|     |            |                                                                      |      |    |      |      |          |       |      |
|-----|------------|----------------------------------------------------------------------|------|----|------|------|----------|-------|------|
| (i) | GO:0033138 | positive regulation of peptidyl-serine phosphorylation               | 50   | 6  | 0,4  | 5,6  | 1,70E-06 | 0,002 | 16,4 |
| (i) | GO:0044249 | cellular biosynthetic process                                        | 4623 | 59 | 33,9 | 25,1 | 1,70E-06 | 0,002 | 1,7  |
| (i) | GO:0007169 | transmembrane receptor protein tyrosine kinase signaling pathway     | 596  | 17 | 4,4  | 12,6 | 1,70E-06 | 0,002 | 3,9  |
| (i) | GO:0050865 | regulation of cell activation                                        | 349  | 13 | 2,6  | 10,4 | 1,80E-06 | 0,002 | 5,1  |
| (i) | GO:0050866 | negative regulation of cell activation                               | 113  | 8  | 0,8  | 7,2  | 1,80E-06 | 0,002 | 9,7  |
| (i) | GO:0051050 | positive regulation of transport                                     | 470  | 15 | 3,4  | 11,6 | 1,90E-06 | 0,002 | 4,4  |
| (i) | GO:0042379 | chemokine receptor binding                                           | 51   | 6  | 0,4  | 5,6  | 1,90E-06 | 0,002 | 16,1 |
| (i) | GO:0008063 | Toll signaling pathway                                               | 80   | 7  | 0,6  | 6,4  | 2,00E-06 | 0,002 | 11,9 |
| (i) | GO:0006979 | response to oxidative stress                                         | 246  | 11 | 1,8  | 9,2  | 2,00E-06 | 0,002 | 6,1  |
| (i) | GO:0046822 | regulation of nucleocytoplasmic transport                            | 154  | 9  | 1,1  | 7,9  | 2,00E-06 | 0,002 | 8    |
| (i) | GO:0052547 | regulation of peptidase activity                                     | 248  | 11 | 1,8  | 9,2  | 2,20E-06 | 0,002 | 6,1  |
| (i) | GO:0050679 | positive regulation of epithelial cell proliferation                 | 116  | 8  | 0,9  | 7,1  | 2,20E-06 | 0,002 | 9,4  |
| (i) | GO:0046483 | heterocycle metabolic process                                        | 4894 | 61 | 35,9 | 25,1 | 2,20E-06 | 0,002 | 1,7  |
| (i) | GO:0042542 | response to hydrogen peroxide                                        | 82   | 7  | 0,6  | 6,4  | 2,30E-06 | 0,002 | 11,6 |
| (i) | GO:0006725 | cellular aromatic compound metabolic process                         | 4900 | 61 | 35,9 | 25,1 | 2,30E-06 | 0,002 | 1,7  |
| (i) | GO:0044267 | cellular protein metabolic process                                   | 3015 | 44 | 22,1 | 21,9 | 2,40E-06 | 0,002 | 2    |
| (i) | GO:0050731 | positive regulation of peptidyl-tyrosine phosphorylation             | 118  | 8  | 0,9  | 7,1  | 2,50E-06 | 0,002 | 9,3  |
| (i) | GO:0000122 | negative regulation of transcription from RNA polymerase II promoter | 483  | 15 | 3,5  | 11,5 | 2,60E-06 | 0,002 | 4,2  |
| (i) | GO:0001892 | embryonic placenta development                                       | 84   | 7  | 0,6  | 6,4  | 2,70E-06 | 0,002 | 11,4 |
| (i) | GO:0032386 | regulation of intracellular transport                                | 255  | 11 | 1,9  | 9,1  | 2,80E-06 | 0,002 | 5,9  |
| (i) | GO:0071260 | cellular response to mechanical stimulus                             | 55   | 6  | 0,4  | 5,6  | 3,00E-06 | 0,002 | 14,9 |
| (i) | GO:0051048 | negative regulation of secretion                                     | 121  | 8  | 0,9  | 7,1  | 3,00E-06 | 0,002 | 9    |
| (i) | GO:0010951 | negative regulation of endopeptidase activity                        | 121  | 8  | 0,9  | 7,1  | 3,00E-06 | 0,002 | 9    |
| (i) | GO:0050900 | leukocyte migration                                                  | 257  | 11 | 1,9  | 9,1  | 3,10E-06 | 0,002 | 5,8  |
| (i) | GO:0006928 | cellular component movement                                          | 1153 | 24 | 8,5  | 15,5 | 3,10E-06 | 0,002 | 2,8  |
| (i) | GO:0030218 | erythrocyte differentiation                                          | 86   | 7  | 0,6  | 6,4  | 3,20E-06 | 0,004 | 11,1 |
| (i) | GO:0002685 | regulation of leukocyte migration                                    | 86   | 7  | 0,6  | 6,4  | 3,20E-06 | 0,004 | 11,1 |
| (i) | GO:0002252 | immune effector process                                              | 430  | 14 | 3,2  | 10,8 | 3,40E-06 | 0,004 | 4,4  |
| (i) | GO:0045892 | negative regulation of transcription, DNA-dependent                  | 770  | 19 | 5,6  | 13,4 | 3,40E-06 | 0,004 | 3,4  |
| (i) | GO:0031667 | response to nutrient levels                                          | 261  | 11 | 1,9  | 9,1  | 3,60E-06 | 0,004 | 5,8  |

|     |            |                                                                                           |      |    |      |      |          |       |      |
|-----|------------|-------------------------------------------------------------------------------------------|------|----|------|------|----------|-------|------|
| (i) | GO:0010466 | negative regulation of peptidase activity                                                 | 124  | 8  | 0,9  | 7,1  | 3,60E-06 | 0,004 | 8,8  |
| (i) | GO:0043154 | negative regulation of cysteine-type endopeptidase activity involved in apoptotic process | 57   | 6  | 0,4  | 5,6  | 3,70E-06 | 0,004 | 14,4 |
| (i) | GO:0033157 | regulation of intracellular protein transport                                             | 167  | 9  | 1,2  | 7,8  | 3,90E-06 | 0,004 | 7,4  |
| (i) | GO:0010629 | negative regulation of gene expression                                                    | 855  | 20 | 6,3  | 13,7 | 4,20E-06 | 0,004 | 3,2  |
| (i) | GO:0043392 | negative regulation of DNA binding                                                        | 34   | 5  | 0,2  | 4,8  | 4,60E-06 | 0,004 | 20,1 |
| (i) | GO:0071704 | organic substance metabolic process                                                       | 8192 | 86 | 60   | 26   | 4,60E-06 | 0,004 | 1,4  |
| (i) | GO:0032844 | regulation of homeostatic process                                                         | 270  | 11 | 2    | 9    | 4,90E-06 | 0,004 | 5,6  |
| (i) | GO:2000116 | regulation of cysteine-type endopeptidase activity                                        | 172  | 9  | 1,3  | 7,7  | 5,00E-06 | 0,004 | 7,1  |
| (i) | GO:2000117 | negative regulation of cysteine-type endopeptidase activity                               | 60   | 6  | 0,4  | 5,6  | 5,00E-06 | 0,004 | 13,6 |
| (i) | GO:0070555 | response to interleukin-1                                                                 | 60   | 6  | 0,4  | 5,6  | 5,00E-06 | 0,004 | 13,6 |
| (i) | GO:0051250 | negative regulation of lymphocyte activation                                              | 92   | 7  | 0,7  | 6,3  | 5,10E-06 | 0,004 | 10,4 |
| (i) | GO:2000113 | negative regulation of cellular macromolecule biosynthetic process                        | 868  | 20 | 6,4  | 13,6 | 5,20E-06 | 0,004 | 3,1  |
| (i) | GO:0002683 | negative regulation of immune system process                                              | 173  | 9  | 1,3  | 7,7  | 5,20E-06 | 0,004 | 7,1  |
| (i) | GO:0030334 | regulation of cell migration                                                              | 386  | 13 | 2,8  | 10,2 | 5,30E-06 | 0,004 | 4,6  |
| (i) | GO:0045639 | positive regulation of myeloid cell differentiation                                       | 61   | 6  | 0,4  | 5,6  | 5,50E-06 | 0,004 | 13,4 |
| (i) | GO:0051253 | negative regulation of RNA metabolic process                                              | 798  | 19 | 5,8  | 13,2 | 5,80E-06 | 0,004 | 3,2  |
| (i) | GO:0045444 | fat cell differentiation                                                                  | 132  | 8  | 1    | 7    | 5,80E-06 | 0,004 | 8,3  |
| (i) | GO:0051128 | regulation of cellular component organization                                             | 1197 | 24 | 8,8  | 15,2 | 5,90E-06 | 0,004 | 2,7  |
| (i) | GO:0006913 | nucleocytoplasmic transport                                                               | 332  | 12 | 2,4  | 9,6  | 6,10E-06 | 0,004 | 4,9  |
| (i) | GO:0044238 | primary metabolic process                                                                 | 7967 | 84 | 58,4 | 25,6 | 6,10E-06 | 0,004 | 1,4  |
| (i) | GO:0002687 | positive regulation of leukocyte migration                                                | 63   | 6  | 0,5  | 5,5  | 6,70E-06 | 0,004 | 13   |
| (i) | GO:0002253 | activation of immune response                                                             | 279  | 11 | 2    | 9    | 6,70E-06 | 0,004 | 5,4  |
| (i) | GO:0051169 | nuclear transport                                                                         | 335  | 12 | 2,5  | 9,5  | 6,70E-06 | 0,004 | 4,9  |
| (i) | GO:0030098 | lymphocyte differentiation                                                                | 227  | 10 | 1,7  | 8,3  | 6,80E-06 | 0,004 | 6    |
| (i) | GO:0051272 | positive regulation of cellular component movement                                        | 228  | 10 | 1,7  | 8,3  | 7,10E-06 | 0,004 | 6    |
| (i) | GO:0051270 | regulation of cellular component movement                                                 | 459  | 14 | 3,4  | 10,6 | 7,10E-06 | 0,004 | 4,2  |
| (i) | GO:0042990 | regulation of transcription factor import into nucleus                                    | 64   | 6  | 0,5  | 5,5  | 7,30E-06 | 0,004 | 12,8 |
| (i) | GO:0009790 | embryo development                                                                        | 889  | 20 | 6,5  | 13,5 | 7,40E-06 | 0,004 | 3,1  |
| (i) | GO:0042991 | transcription factor import into nucleus                                                  | 65   | 6  | 0,5  | 5,5  | 8,00E-06 | 0,004 | 12,6 |
| (i) | GO:0051223 | regulation of protein transport                                                           | 286  | 11 | 2,1  | 8,9  | 8,50E-06 | 0,004 | 5,2  |

|       |            |                                                                                |      |    |      |      |          |        |      |
|-------|------------|--------------------------------------------------------------------------------|------|----|------|------|----------|--------|------|
| (i)   | GO:0050778 | positive regulation of immune response                                         | 344  | 12 | 2,5  | 9,5  | 8,80E-06 | 0,004  | 4,8  |
| (i)   | GO:1901360 | organic cyclic compound metabolic process                                      | 5098 | 61 | 37,4 | 23,6 | 9,30E-06 | 0,004  | 1,6  |
| (i)   | GO:0008015 | blood circulation                                                              | 347  | 12 | 2,5  | 9,5  | 9,60E-06 | 0,004  | 4,7  |
| (i)   | GO:0003013 | circulatory system process                                                     | 348  | 12 | 2,6  | 9,4  | 9,90E-06 | 0,004  | 4,7  |
| (i)   | GO:0004857 | enzyme inhibitor activity                                                      | 291  | 11 | 2,1  | 8,9  | 1,00E-05 | 0,004  | 5,2  |
| (i)   | GO:0043491 | protein kinase B signaling cascade                                             | 102  | 7  | 0,7  | 6,3  | 1,00E-05 | 0,004  | 9,4  |
| (i)   | GO:2000145 | regulation of cell motility                                                    | 410  | 13 | 3    | 10   | 1,00E-05 | 0,004  | 4,3  |
| (i)   | GO:0050727 | regulation of inflammatory response                                            | 188  | 9  | 1,4  | 7,6  | 1,00E-05 | 0,004  | 6,5  |
| (i)   | GO:0050670 | regulation of lymphocyte proliferation                                         | 143  | 8  | 1    | 7    | 1,00E-05 | 0,004  | 7,6  |
| (i)   | GO:1901215 | negative regulation of neuron death                                            | 103  | 7  | 0,8  | 6,2  | 1,10E-05 | 0,004  | 9,3  |
| (i)   | GO:0032944 | regulation of mononuclear cell proliferation                                   | 144  | 8  | 1,1  | 6,9  | 1,10E-05 | 0,004  | 7,6  |
| (ii)  | GO:0034976 | response to endoplasmic reticulum stress                                       | 109  | 17 | 1,1  | 15,9 | 5,80E-16 | <0.001 | 15,8 |
| (ii)  | GO:0006986 | response to unfolded protein                                                   | 125  | 15 | 1,2  | 13,8 | 1,70E-12 | <0.001 | 12,1 |
| (ii)  | GO:0035966 | response to topologically incorrect protein                                    | 132  | 15 | 1,3  | 13,7 | 3,80E-12 | <0.001 | 11,5 |
| (ii)  | GO:0006984 | ER-nucleus signaling pathway                                                   | 94   | 13 | 0,9  | 12,1 | 8,50E-12 | <0.001 | 14   |
| (ii)  | GO:0030968 | endoplasmic reticulum unfolded protein response                                | 83   | 12 | 0,8  | 11,2 | 3,20E-11 | <0.001 | 14,6 |
| (ii)  | GO:0034620 | cellular response to unfolded protein                                          | 84   | 12 | 0,8  | 11,2 | 3,70E-11 | <0.001 | 14,4 |
| (ii)  | GO:0035967 | cellular response to topologically incorrect protein                           | 89   | 12 | 0,9  | 11,1 | 7,50E-11 | <0.001 | 13,6 |
| (ii)  | GO:0033554 | cellular response to stress                                                    | 1155 | 35 | 11,4 | 23,6 | 2,40E-09 | <0.001 | 3,1  |
| (ii)  | GO:0042221 | response to chemical stimulus                                                  | 2611 | 53 | 25,8 | 27,2 | 1,30E-07 | <0.001 | 2,1  |
| (ii)  | GO:0006987 | activation of signaling protein activity involved in unfolded protein response | 62   | 8  | 0,6  | 7,4  | 1,70E-07 | <0.001 | 13   |
| (ii)  | GO:0032075 | positive regulation of nuclease activity                                       | 64   | 8  | 0,6  | 7,4  | 2,20E-07 | <0.001 | 12,6 |
| (ii)  | GO:0032069 | regulation of nuclease activity                                                | 70   | 8  | 0,7  | 7,3  | 4,40E-07 | 0,002  | 11,5 |
| (ii)  | GO:0010033 | response to organic substance                                                  | 1788 | 40 | 17,7 | 22,3 | 6,50E-07 | 0,002  | 2,3  |
| (ii)  | GO:0070887 | cellular response to chemical stimulus                                         | 1620 | 37 | 16   | 21   | 1,20E-06 | 0,002  | 2,3  |
| (ii)  | GO:0006950 | response to stress                                                             | 2762 | 52 | 27,3 | 24,7 | 1,90E-06 | 0,002  | 1,9  |
| (ii)  | GO:0044723 | single-organism carbohydrate metabolic process                                 | 522  | 18 | 5,2  | 12,8 | 4,60E-06 | 0,004  | 3,5  |
| (iii) | GO:0048518 | positive regulation of biological process                                      | 3286 | 36 | 15,1 | 20,9 | 1,00E-07 | <0.001 | 2,4  |
| (iii) | GO:0045893 | positive regulation of transcription, DNA-dependent                            | 973  | 18 | 4,5  | 13,5 | 3,40E-07 | <0.001 | 4    |
| (iii) | GO:0051254 | positive regulation of RNA metabolic process                                   | 1018 | 18 | 4,7  | 13,3 | 6,60E-07 | <0.001 | 3,8  |
| (iii) | GO:0010628 | positive regulation of gene expression                                         | 1054 | 18 | 4,8  | 13,2 | 1,10E-06 | <0.001 | 3,7  |

|       |            |                                                                         |      |    |      |      |          |        |     |
|-------|------------|-------------------------------------------------------------------------|------|----|------|------|----------|--------|-----|
| (iii) | GO:0048584 | positive regulation of response to stimulus                             | 1091 | 18 | 5    | 13   | 1,80E-06 | <0.001 | 3,6 |
| (iii) | GO:0045944 | positive regulation of transcription from RNA polymerase II promoter    | 684  | 14 | 3,1  | 10,9 | 2,60E-06 | <0.001 | 4,5 |
| (iii) | GO:0045935 | positive regulation of nucleobase-containing compound metabolic process | 1141 | 18 | 5,2  | 12,8 | 3,40E-06 | <0.001 | 3,4 |
| (iii) | GO:0010557 | positive regulation of macromolecule biosynthetic process               | 1146 | 18 | 5,3  | 12,7 | 3,60E-06 | <0.001 | 3,4 |
| (iii) | GO:0051173 | positive regulation of nitrogen compound metabolic process              | 1160 | 18 | 5,3  | 12,7 | 4,20E-06 | <0.001 | 3,4 |
| (iii) | GO:0048522 | positive regulation of cellular process                                 | 2993 | 31 | 13,8 | 17,2 | 4,30E-06 | <0.001 | 2,3 |
| (iii) | GO:0080090 | regulation of primary metabolic process                                 | 4014 | 37 | 18,4 | 18,6 | 5,00E-06 | <0.001 | 2   |
| (iii) | GO:0006357 | regulation of transcription from RNA polymerase II promoter             | 1185 | 18 | 5,4  | 12,6 | 5,70E-06 | <0.001 | 3,3 |
| (iii) | GO:0042221 | response to chemical stimulus                                           | 2611 | 28 | 12   | 16   | 8,10E-06 | 0,002  | 2,3 |
| (iii) | GO:0031328 | positive regulation of cellular biosynthetic process                    | 1220 | 18 | 5,6  | 12,4 | 8,50E-06 | 0,002  | 3,2 |
| (iii) | GO:0006355 | regulation of transcription, DNA-dependent                              | 2639 | 28 | 12,1 | 15,9 | 1,00E-05 | 0,004  | 2,3 |
| (iii) | GO:0044707 | single-multicellular organism process                                   | 5039 | 42 | 23,2 | 18,8 | 1,00E-05 | 0,004  | 1,8 |
| (iii) | GO:0009891 | positive regulation of biosynthetic process                             | 1239 | 18 | 5,7  | 12,3 | 1,10E-05 | 0,004  | 3,2 |
| (iii) | GO:0048583 | regulation of response to stimulus                                      | 2196 | 25 | 10,1 | 14,9 | 1,10E-05 | 0,004  | 2,5 |
| (iii) | GO:0050789 | regulation of biological process                                        | 7458 | 54 | 34,3 | 19,7 | 1,10E-05 | 0,004  | 1,6 |
| (iii) | GO:2001141 | regulation of RNA biosynthetic process                                  | 2657 | 28 | 12,2 | 15,8 | 1,10E-05 | 0,004  | 2,3 |
| (iii) | GO:0009893 | positive regulation of metabolic process                                | 1934 | 23 | 8,9  | 14,1 | 1,30E-05 | 0,004  | 2,6 |
| (iii) | GO:0050794 | regulation of cellular process                                          | 7076 | 52 | 32,5 | 19,5 | 1,40E-05 | 0,004  | 1,6 |
| (iii) | GO:0010604 | positive regulation of macromolecule metabolic process                  | 1804 | 22 | 8,3  | 13,7 | 1,50E-05 | 0,004  | 2,7 |
| (iii) | GO:0051252 | regulation of RNA metabolic process                                     | 2712 | 28 | 12,5 | 15,5 | 1,70E-05 | 0,004  | 2,2 |
| (iii) | GO:0031325 | positive regulation of cellular metabolic process                       | 1835 | 22 | 8,4  | 13,6 | 1,90E-05 | 0,004  | 2,6 |
| (iii) | GO:0031323 | regulation of cellular metabolic process                                | 4071 | 36 | 18,7 | 17,3 | 2,00E-05 | 0,004  | 1,9 |
| (iv)  | GO:0009058 | biosynthetic process                                                    | 4754 | 73 | 45,5 | 27,5 | 4,00E-06 | 0,002  | 1,6 |
| (v)   | GO:0048585 | negative regulation of response to stimulus                             | 748  | 18 | 4,9  | 13,1 | 1,60E-06 | 0,004  | 3,7 |
| (v)   | GO:0009888 | tissue development                                                      | 1211 | 23 | 7,9  | 15,1 | 2,90E-06 | 0,004  | 2,9 |
| (vi)  | GO:0090304 | nucleic acid metabolic process                                          | 4054 | 39 | 19,7 | 19,3 | 4,30E-06 | <0.001 | 2   |
| (vi)  | GO:0044249 | cellular biosynthetic process                                           | 4623 | 42 | 22,5 | 19,5 | 6,30E-06 | <0.001 | 1,9 |
| (vi)  | GO:0034645 | cellular macromolecule biosynthetic process                             | 3798 | 37 | 18,5 | 18,5 | 6,70E-06 | <0.001 | 2   |
| (vi)  | GO:0009892 | negative regulation of metabolic process                                | 1386 | 20 | 6,7  | 13,3 | 8,60E-06 | 0,002  | 3   |

|        |            |                                                                    |       |     |      |      |          |        |      |
|--------|------------|--------------------------------------------------------------------|-------|-----|------|------|----------|--------|------|
| (vi)   | GO:1901576 | organic substance biosynthetic process                             | 4696  | 42  | 22,9 | 19,1 | 9,60E-06 | 0,002  | 1,8  |
| (vi)   | GO:0010605 | negative regulation of macromolecule metabolic process             | 1294  | 19  | 6,3  | 12,7 | 1,20E-05 | 0,002  | 3    |
| (vi)   | GO:0009058 | biosynthetic process                                               | 4754  | 42  | 23,1 | 18,9 | 1,30E-05 | 0,002  | 1,8  |
| (vi)   | GO:0009059 | macromolecule biosynthetic process                                 | 3909  | 37  | 19   | 18   | 1,30E-05 | 0,002  | 1,9  |
| (vi)   | GO:2000113 | negative regulation of cellular macromolecule biosynthetic process | 868   | 15  | 4,2  | 10,8 | 1,80E-05 | 0,002  | 3,6  |
| (vi)   | GO:2000112 | regulation of cellular macromolecule biosynthetic process          | 2876  | 30  | 14   | 16   | 2,10E-05 | 0,002  | 2,1  |
| (vi)   | GO:0005634 | nucleus                                                            | 5382  | 45  | 26,2 | 18,8 | 2,20E-05 | 0,002  | 1,7  |
| (vi)   | GO:0031326 | regulation of cellular biosynthetic process                        | 3065  | 31  | 14,9 | 16,1 | 2,70E-05 | 0,004  | 2,1  |
| (vi)   | GO:0051171 | regulation of nitrogen compound metabolic process                  | 3223  | 32  | 15,7 | 16,3 | 2,80E-05 | 0,004  | 2    |
| (vi)   | GO:0010558 | negative regulation of macromolecule biosynthetic process          | 902   | 15  | 4,4  | 10,6 | 2,80E-05 | 0,004  | 3,4  |
| (vi)   | GO:0006351 | transcription, DNA-dependent                                       | 2914  | 30  | 14,2 | 15,8 | 2,80E-05 | 0,004  | 2,1  |
| (vii)  | GO:0005694 | chromosome                                                         | 609   | 23  | 4,8  | 18,2 | 3,70E-10 | <0.001 | 4,8  |
| (vii)  | GO:0044427 | chromosomal part                                                   | 517   | 21  | 4    | 17   | 6,30E-10 | <0.001 | 5,2  |
| (vii)  | GO:0005634 | nucleus                                                            | 5382  | 76  | 42,1 | 33,9 | 2,30E-09 | <0.001 | 1,8  |
| (vii)  | GO:0043229 | intracellular organelle                                            | 9593  | 109 | 75   | 34   | 3,70E-09 | <0.001 | 1,5  |
| (vii)  | GO:0043231 | intracellular membrane-bounded organelle                           | 8764  | 103 | 68,5 | 34,5 | 3,80E-09 | <0.001 | 1,5  |
| (vii)  | GO:0043227 | membrane-bounded organelle                                         | 8794  | 103 | 68,8 | 34,2 | 4,80E-09 | <0.001 | 1,5  |
| (vii)  | GO:0051276 | chromosome organization                                            | 683   | 22  | 5,3  | 16,7 | 1,70E-08 | <0.001 | 4,1  |
| (vii)  | GO:0003676 | nucleic acid binding                                               | 2962  | 46  | 23,2 | 22,8 | 1,70E-06 | 0,002  | 2    |
| (vii)  | GO:0006259 | DNA metabolic process                                              | 838   | 21  | 6,6  | 14,4 | 2,30E-06 | 0,002  | 3,2  |
| (vii)  | GO:0044424 | intracellular part                                                 | 11026 | 112 | 86,2 | 25,8 | 3,40E-06 | 0,002  | 1,3  |
| (vii)  | GO:0005622 | intracellular                                                      | 11217 | 113 | 87,7 | 25,3 | 4,40E-06 | 0,004  | 1,3  |
| (viii) | GO:0022403 | cell cycle phase                                                   | 752   | 20  | 3,8  | 16,2 | 7,70E-10 | <0.001 | 5,3  |
| (viii) | GO:0065004 | protein-DNA complex assembly                                       | 136   | 10  | 0,7  | 9,3  | 1,60E-09 | <0.001 | 14,6 |
| (viii) | GO:0022402 | cell cycle process                                                 | 1022  | 22  | 5,1  | 16,9 | 4,80E-09 | <0.001 | 4,3  |
| (viii) | GO:0071824 | protein-DNA complex subunit organization                           | 155   | 10  | 0,8  | 9,2  | 5,70E-09 | <0.001 | 12,8 |
| (viii) | GO:0031497 | chromatin assembly                                                 | 118   | 9   | 0,6  | 8,4  | 7,90E-09 | <0.001 | 15,2 |
| (viii) | GO:0006333 | chromatin assembly or disassembly                                  | 136   | 9   | 0,7  | 8,3  | 2,80E-08 | <0.001 | 13,2 |
| (viii) | GO:0006334 | nucleosome assembly                                                | 110   | 8   | 0,6  | 7,4  | 8,10E-08 | <0.001 | 14,5 |
| (viii) | GO:0000786 | nucleosome                                                         | 74    | 7   | 0,4  | 6,6  | 8,90E-08 | <0.001 | 18,8 |
| (viii) | GO:0006323 | DNA packaging                                                      | 156   | 9   | 0,8  | 8,2  | 9,00E-08 | <0.001 | 11,5 |
| (viii) | GO:0000278 | mitotic cell cycle                                                 | 729   | 17  | 3,7  | 13,3 | 1,20E-07 | <0.001 | 4,6  |
| (viii) | GO:0000279 | M phase                                                            | 504   | 14  | 2,5  | 11,5 | 2,10E-07 | <0.001 | 5,5  |
| (viii) | GO:0000087 | M phase of mitotic cell cycle                                      | 357   | 12  | 1,8  | 10,2 | 2,30E-07 | <0.001 | 6,7  |
| (viii) | GO:0034728 | nucleosome organization                                            | 129   | 8   | 0,6  | 7,4  | 2,80E-07 | <0.001 | 12,3 |
| (viii) | GO:0051301 | cell division                                                      | 449   | 13  | 2,3  | 10,7 | 3,80E-07 | <0.001 | 5,8  |
| (viii) | GO:0007049 | cell cycle                                                         | 1314  | 22  | 6,6  | 15,4 | 4,10E-07 | <0.001 | 3,3  |
| (viii) | GO:0071103 | DNA conformation change                                            | 189   | 9   | 1    | 8    | 4,60E-07 | <0.001 | 9,5  |
| (viii) | GO:0007067 | mitosis                                                            | 346   | 11  | 1,7  | 9,3  | 1,30E-06 | <0.001 | 6,3  |



|        |            |                                          |     |    |     |      |          |        |      |
|--------|------------|------------------------------------------|-----|----|-----|------|----------|--------|------|
| (viii) | GO:0000280 | nuclear division                         | 346 | 11 | 1,7 | 9,3  | 1,30E-06 | <0.001 | 6,3  |
| (viii) | GO:0032993 | protein-DNA complex                      | 115 | 7  | 0,6 | 6,4  | 1,80E-06 | <0.001 | 12,1 |
| (viii) | GO:0044427 | chromosomal part                         | 517 | 13 | 2,6 | 10,4 | 1,80E-06 | <0.001 | 5    |
| (viii) | GO:0034622 | cellular macromolecular complex assembly | 526 | 13 | 2,6 | 10,4 | 2,20E-06 | <0.001 | 4,9  |
| (viii) | GO:0048285 | organelle fission                        | 369 | 11 | 1,9 | 9,1  | 2,40E-06 | <0.001 | 5,9  |
| (viii) | GO:0005694 | chromosome                               | 609 | 13 | 3,1 | 9,9  | 1,10E-05 | 0,002  | 4,2  |

|  |                                             |
|--|---------------------------------------------|
|  | cell death                                  |
|  | signaling/response to stimulus              |
|  | cell proliferation/motility/differentiation |
|  | biosynthetic/metabolism processes           |
|  | nuclear/ organelle/ chromatin modifications |
|  | cell cycle                                  |
