# Supplementary material for: Senescence-secreted factors activate Myc and sensitize pretransformed cells to TRAIL-induced apoptosis
Source: PubMed Central journal article supplement (PMC4326894; doi:10.1111/acel.12197), 2014-03-04
Supplement: acel0013-0487-sd9.pdf [file acel0013-0487-sd9.pdf]

Table S2. Primers used in Quantitative PCR

|                           |                                 |
|---------------------------|---------------------------------|
| FLIP <sub>L</sub> forward | 5'-TGCCTCAGAGCATACCTGAAGAGA-3'  |
| FLIP <sub>L</sub> reverse | 5'-TCTCGAAGAAGCTCTGTCTCATTGC-3' |
| GAPDH forward             | 5'-ATGACATCAAGAAGGTGGTGA-3'     |
| GAPDH reverse             | 5'-CTGTAGCCAAATTCGTTGTCA-3'     |
| IL6 receptor forward      | 5'-GGGCTGGAACGGTCAAAGACA-3'     |
| IL6 receptor reverse      | 5'-GGATGACACAGTGATGCTGGA-3'     |
| 36B4 forward              | 5'-GATTGGCTACCCAAGTGTG-3'       |
| 36B4 reverse              | 5'-CAGGGGCAGCAGCCACAAA-3'       |
| IL6 forward               | 5'-CCAGGAGCCCAGCTATGAAC-3'      |
| IL6 reverse               | 5'-CCCAGGGAGAAGGCAACTG-3'       |
| IL8 forward               | 5'-TTGGCAGCCTTCCTGATTTC-3'      |
| IL8 reverse               | 5'-TCTTTAGCACTCCTTGGCAAAC-3'    |
